33 **Abstract.**

34

35 Despite massive investment in research on reservoirs of emerging pathogens, it remains difficult to  
36 rapidly identify the wildlife origins of novel zoonotic viruses. Viral surveillance is costly but rarely  
37 optimized using model-guided prioritization strategies, and predictions from a single model may be  
38 highly uncertain. Here, we generate an ensemble of eight network- and trait-based statistical models that  
39 predict mammal-virus associations, and we use model predictions to develop a set of priority  
40 recommendations for sampling potential bat reservoirs and intermediate hosts for SARS-CoV-2 and  
41 related betacoronaviruses. We find over 200 bat species globally could be undetected hosts of  
42 betacoronaviruses. Although over a dozen species of Asian horseshoe bats (*Rhinolophus* spp.) are known  
43 to harbor SARS-like coronaviruses, we find at least two thirds of betacoronavirus reservoirs in this bat  
44 genus might still be undetected. Although identification of other probable mammal reservoirs is likely  
45 beyond existing predictive capacity, some of our findings are surprisingly plausible; for example, several  
46 civet and pangolin species were highlighted as high-priority species for viral sampling. Our results should  
47 not be over-interpreted as novel information about the plausibility or likelihood of SARS-CoV-2's  
48 ultimate origin, but rather these predictions could help guide sampling for novel potentially zoonotic  
49 viruses; immunological research to characterize key receptors (e.g., ACE2) and identify mechanisms of  
50 viral tolerance; and experimental infections to quantify competence of suspected host species.

## 51 Introduction

52

53 Coronaviruses are a diverse family of positive-sense, single-stranded RNA viruses, found widely in  
54 mammals and birds<sup>1</sup>. They have a broad host range, a high mutation rate, and the largest genomes of any  
55 RNA viruses, but they have also evolved mechanisms for RNA proofreading and repair, which help to  
56 mitigate the deleterious effects of a high recombination rate acting over a large genome<sup>2</sup>. Consequently,  
57 coronaviruses fit the profile of viruses with high zoonotic potential. There are seven human coronaviruses  
58 (two in the genus *Alphacoronavirus* and five in *Betacoronavirus*), of which three are highly pathogenic in  
59 humans: SARS-CoV, SARS-CoV-2, and MERS-CoV. These three are zoonotic and widely agreed to  
60 have evolutionary origins in bats<sup>3-6</sup>.

61

62 Our collective experience with both SARS-CoV and MERS-CoV illustrate the difficulty of tracing  
63 specific animal hosts of emerging coronaviruses. During the 2002–2003 SARS epidemic, SARS-CoV  
64 was traced to the masked palm civet (*Paguma larvata*)<sup>7</sup>, but the ultimate origin remained unknown for  
65 several years. Horseshoe bats (family Rhinolophidae: *Rhinolophus*) were implicated as reservoir hosts in  
66 2005, but their SARS-like viruses were not identical to circulating human strains<sup>4</sup>. Stronger evidence  
67 from 2017 placed the most likely evolutionary origin of SARS-CoV in *Rhinolophus ferrumequinum* or  
68 potentially *R. sinicus*<sup>8</sup>. Presently, there is even less certainty in the origins of MERS-CoV, although  
69 spillover to humans occurs relatively often through contact with dromedary camels (*Camelus*  
70 *dromedarius*). A virus with 100% nucleotide identity in a ~200 base pair region of the polymerase gene  
71 was detected in *Taphozous* bats (family Emballonuridae) in Saudi Arabia<sup>9</sup>; however, based on spike gene  
72 similarity, other sources treat HKU4 virus from *Tylonycteris* bats (family Vespertilionidae) in China as  
73 the closest-related bat virus<sup>10,11</sup>. Several bat coronaviruses have shown close relation to MERS-CoV, with  
74 a surprisingly broad geographic distribution from Mexico to China<sup>12,13,14,15</sup>.

75

76 Coronavirus disease 2019 (COVID-19) is caused by severe acute respiratory syndrome coronavirus-2  
77 (SARS-CoV-2), a novel virus with presumed evolutionary origins in bats. Although the earliest cases  
78 were linked to a wildlife market, contact tracing was limited, and there has been no definitive  
79 identification of the wildlife contact that resulted in spillover nor a true “index case.” Two bat viruses are  
80 closely related to SARS-CoV-2: RaTG13 bat CoV from *Rhinolophus affinis* (96% identical overall), and  
81 RmYN02 bat CoV from *Rhinolophus malayanus* (97% identical in one gene but only 61% in the  
82 receptor-binding domain and with less overall similarity)<sup>6,16</sup>. The divergence time between these bat  
83 viruses and human SARS-CoV-2 has been estimated as 40-50 years<sup>17</sup>, suggesting that the main host(s)  
84 involved in spillover remain unknown. Evidence of viral recombination in pangolins has been proposed  
85 but is unresolved<sup>17</sup>. SARS-like betacoronaviruses have been recently isolated from Malayan pangolins  
86 (*Manis javanica*) traded in wildlife markets<sup>18,19</sup>, and these viruses have a very high amino acid identity to  
87 SARS-CoV-2, but only show a ~90% nucleotide identity with SARS-CoV-2 or Bat-CoV RaTG13<sup>20</sup>. None  
88 of these host species are universally accepted as the origin of SARS-CoV-2 or a progenitor virus, and a  
89 “better fit” wildlife reservoir could likely still be identified. However, substantial gaps in betacoronavirus  
90 sampling across wildlife limit actionable inference about plausible reservoirs and intermediate hosts for  
91 SARS-CoV-2<sup>21</sup>.

92

93 Identifying likely reservoirs of zoonotic pathogens is challenging<sup>22</sup>. Sampling wildlife for the presence of  
94 active or previous infection (i.e., seropositivity) represents the first stage of a pipeline for proper inference

95 of host species<sup>23</sup>, but sampling is often limited in phylogenetic, temporal, and spatial scale by logistical  
96 constraints<sup>24</sup>. Given such restrictions, modeling efforts can play a critical role in helping to prioritize  
97 pathogen surveillance by narrowing the set of plausible sampling targets<sup>25</sup>. For example, machine learning  
98 approaches have generated candidate lists of likely, but unsampled, primate reservoirs for Zika virus, bat  
99 reservoirs for filoviruses, and avian reservoirs for *Borrelia burgdorferi*<sup>26–28</sup>. In some contexts, models  
100 may be more useful for identifying which host or pathogen groups are *unlikely* to have zoonotic  
101 potential<sup>29</sup>. However, these approaches are generally applied individually to generate predictions.  
102 Implementation of multiple modeling approaches collaboratively and simultaneously could reduce  
103 redundancy and apparent disagreement at the earliest stages of pathogen tracing and help advance  
104 modeling work by addressing inter-model reliability, predictive accuracy, and the broader utility (or  
105 inefficacy) of such models in zoonosis research.

106  
107 Because SARS-like coronaviruses (subgenus *Sarbecovirus*) are only characterized from a small number  
108 of bat species in publicly available data, current modeling methods are poorly tailored to exactly infer  
109 their potential reservoir hosts. In this study, we instead conduct two predictive efforts that may help guide  
110 the inevitable search for known and future zoonotic coronaviruses in wildlife: (1) broadly identifying bats  
111 and other mammals that may host any *Betacoronavirus* and (2) specifically identifying species with a  
112 high viral sharing probability with the two *Rhinolophus* species carrying the closest known wildlife  
113 relatives of SARS-CoV-2. To do this, we developed a standardized dataset of mammal-virus associations  
114 by integrating a previously published mammal-virus dataset<sup>30</sup> with a targeted scrape of all GenBank  
115 accessions for Coronaviridae and their associated hosts. Our final dataset spanned 710 host species and  
116 359 virus genera, including 107 mammal hosts of betacoronaviruses as well as hundreds of other (non-  
117 coronavirus) association records. We integrated our host-virus data with a mammal phylogenetic  
118 supertree<sup>31</sup> and over 60 ecological traits of bat species<sup>27,32,33</sup>.

119  
120 We used these standardized data to generate an ensemble of predictive models. We drew on two popular  
121 approaches to identify candidate reservoirs and intermediate hosts of betacoronaviruses. *Network-based*  
122 *methods* estimate a full set of “true” unobserved host-virus interactions based on a recorded network of  
123 associations (here, pairs of host species and associated viral genera). These methods are increasingly  
124 popular as a way to identify latent processes structuring ecological networks<sup>34–36</sup>, but they are often  
125 confounded by sampling bias and can only make predictions for species within the observed network (i.e.,  
126 those that have available virus data; in-sample prediction). In contrast, *trait-based methods* use observed  
127 relationships concerning host traits to identify species that fit the morphological, ecological, and/or  
128 phylogenetic profile of known host species of a given pathogen and rank the suitability of unknown hosts  
129 based on these trait profiles<sup>28,37</sup>. These methods may be more likely to recapitulate patterns in observed  
130 host-pathogen association data (e.g., geographic biases in sampling, phylogenetic similarity in host  
131 morphology), but they more easily correct for sampling bias and can predict host species without known  
132 viral associations (out-of-sample prediction).

133  
134 In total, we implemented eight different models of host-virus associations, including four network-based  
135 approaches, three trait-based approaches, and one hybrid approach using both network and trait  
136 information. These efforts generated eight ranked lists of suspected bat hosts of betacoronaviruses and  
137 five ranked lists for other mammals. Each ranked list was scaled proportionally and consolidated in an

138 ensemble of recommendations for betacoronavirus sampling and broader eco-evolutionary research  
139 (Supplemental Figure 1).

140

## 141 **Results**

142

### 143 *Predicted bat hosts of betacoronaviruses*

144

145 Predictions of bat hosts of betacoronavirus derived from network- and trait-based approaches displayed  
146 strong inter-model agreement within-group, but less with each other (Figure 1A,B). In-sample, we  
147 identified bat species across a range of genera as having the highest predicted probabilities of hosting  
148 betacoronaviruses, distributed in distinct families in both the Old World (e.g., Hipposideridae, several  
149 subfamilies in the Vespertilionidae) and the New World (e.g., *Artibeus jamaicensis* from the  
150 Phyllostomidae; Figure 1C). Out-of-sample, our multi-model ensemble more conservatively limited  
151 predictions to primarily Old World families such as Rhinolophidae and Pteropodidae (Figure 1D). Of the  
152 1,037 bat hosts not currently known to host betacoronaviruses, our models identified between 1 and 720  
153 potential hosts based on a 10% omission threshold (90% sensitivity). Applying this same threshold to our  
154 ensemble predictions, we identified 239 bat species that are likely undetected hosts of betacoronaviruses.  
155 These include more half of bat species in the genus *Rhinolophus* not currently known to be  
156 betacoronavirus hosts (35 of 61), compared to 16 known hosts in this genus. Given known roles of  
157 rhinolophids as hosts of SARS-like coronaviruses, our results suggest that SARS-like coronavirus  
158 diversity could be undescribed for around two-thirds of the potential reservoir bat species.

159

160 Our multi-model ensemble predicted undiscovered betacoronavirus bat hosts with striking geographic  
161 patterning (Figure 2). In-sample, the top 50 predicted bat hosts were broadly distributed and recapitulated  
162 observed patterns of bat betacoronavirus hosts in Europe, parts of sub-Saharan Africa, and Southeast  
163 Asia, although our models also predicted greater-than-expected richness of likely bat reservoirs in the  
164 Neotropics and North America. In contrast, the top out-of-sample predictions clustered in Vietnam,  
165 Myanmar, and southern China.

166

167 Because only trait-based models were capable of out-of-sample prediction, the differences in geographic  
168 patterns of our predictions likely reflect distinctions between the network- and trait-based modeling  
169 approaches, which we suggest should be considered qualitatively different lines of evidence. Network  
170 approaches proportionally upweight species with high observed viral diversity, recapitulating sampling  
171 biases largely unrelated to coronaviruses (e.g., frequent screening for rabies lyssaviruses in vampire bats,  
172 which have been sampled in a comparatively limited capacity for coronaviruses<sup>14,38-40</sup>). Highly ranked  
173 species may also have been previously sampled without evidence of betacoronavirus presence; for  
174 example, *Rhinolophus luctus* and *Macroglossus sobrinus* from China and Thailand, respectively, tested  
175 negative for betacoronaviruses, but detection probability was limited by small sample sizes<sup>41-43</sup>. In  
176 contrast, trait-based approaches are constrained by their reliance on phylogeny and ecological traits, and  
177 the use of geographic covariates made models more likely to recapitulate existing spatial patterns of  
178 betacoronavirus detection (i.e., clustering in southeast Asia). However, their out-of-sample predictions  
179 are, by definition, inclusive of unsampled hosts<sup>44</sup>, which potentially offer greater return on viral  
180 discovery investment.

181

182 Multi-model ensemble predictions also clustered taxonomically along parallel lines. Applying a graph  
183 partitioning algorithm (phylogenetic factorization) to the bat phylogeny<sup>45</sup>, we found that in-sample  
184 predictions were on average lowest for the Yangochiroptera (Figure 3). This makes intuitive sense,  
185 because this clade does not include the groups known to harbor the majority of betacoronaviruses  
186 detected in bats (e.g., *Rhinolophus*, Hipposideridae). Out-of-sample predictions were lower in the New  
187 World superfamily Noctilionoidea, the emballonurids, and the *Lasiurus* genus, whereas the *Rhinolophus*  
188 genus and the Old World fruit bats (Pteropodidae) both had higher mean probabilities of betacoronavirus  
189 hosting (Supplemental Table 1).

190  
191 These clade-specific patterns of predicted probabilities across extant bats could be particularly applicable  
192 for guiding future surveillance. On the one hand, betacoronavirus sampling in southeast Asian bat taxa  
193 (especially the genus *Rhinolophus*) may have a high success of viral detection but may not improve  
194 existing bat sampling gaps<sup>46</sup>. On the other hand, discovery of novel betacoronaviruses in Neotropical bats  
195 or Old World fruit bats could significantly revise our understanding of the bat-virus association network.  
196 Such discoveries would be particularly important for global health security, given the surprising  
197 identification of a MERS-like virus in Mexican bats<sup>14</sup> and the likelihood that post-COVID pandemic  
198 preparedness efforts will focus disproportionately on Asia despite the near-global presence of bat  
199 betacoronaviruses.

200

### 201 ***Mammal-wide predictions***

202

203 Although our ensemble model of potential bat betacoronavirus reservoirs generated strong and actionable  
204 predictions, our mammal-wide predictions were largely uninformative. In particular, minimal inter-model  
205 agreement (Supplemental Figure 2) indicated a lack of consistent, biologically meaningful findings.  
206 Major effects of sampling bias were apparent from the top-ranked species, which were primarily domestic  
207 animals or well-studied mesocarnivores (ED Figure 2B). Phylogenetic factorization mostly failed to find  
208 specific patterns in prediction (Supplemental Table 2): in-sample, mean predictions primarily confirmed  
209 betacoronavirus detection in the remaining Laurasiatheria (e.g., ungulates, carnivores, pangolins,  
210 hedgehogs, shrews), although nested clades of marine mammals (i.e., cetaceans) were less likely to harbor  
211 these viruses. Although cetaceans are predicted to be susceptible to SARS-CoV-2 based on ACE2  
212 similarity with humans<sup>47</sup>, this result is expected given betacoronavirus epidemiology and their  
213 predominance in terrestrial mammals. Our mammal predictions thus reflect a combination of detection  
214 bias and poor performance of network methods on limited data that likely signals the limits of existing  
215 predictive capacity. Our dataset contained only 30 non-bat betacoronavirus hosts, many of which were  
216 identified during sampling efforts following the first SARS outbreak<sup>7</sup>. Although the laurasiatherians  
217 include more potential intermediate hosts than other mammals, likely driven by inclusion of bats in this  
218 group, the high species diversity of this clade restricts insights for sampling prioritization, experimental  
219 work, or spillover risk management.

220

### 221 ***SARS-CoV-2 sampling priorities***

222

223 Given the unresolved origins of SARS-CoV-2 and significant motivation to identify other SARS-like  
224 coronaviruses and their reservoir hosts for pandemic preparedness<sup>21</sup>, we further explored our only model  
225 that could generate out-of-sample predictions for all mammals<sup>48</sup>. This model uses geographic distributions

226 and phylogenetic relatedness to estimate viral sharing probability. Where one or more (potential) hosts are  
227 known, these sharing patterns can be interpreted to identify probable reservoir hosts<sup>48</sup>. Because  
228 *Rhinolophus affinis* and *R. malayanus* host viruses that are closely related to SARS-CoV-2<sup>6,16</sup>, we used  
229 their predicted sharing patterns to identify possible reservoirs of sarbecoviruses. In doing so, we aimed to  
230 work around a major data limitation: fewer than 20 sarbecovirus hosts were recorded in our dataset, a  
231 sample size that would preclude most modeling approaches.

232  
233 For both presumed bat host species of sarbecoviruses, the most probable viral sharing hosts were again  
234 within the Laurasiatheria. Although bats—especially rhinolophids—unsurprisingly assumed the top  
235 predictions given phylogenetic affinity with known hosts (Supplemental Table 3, Supplemental Figure 3),  
236 several notable patterns emerged in the rankings of other mammals. Pangolins (Pholidota) were  
237 disproportionately likely to share viruses with *R. affinis* and *R. malayanus* (Supplemental Figure 4); the  
238 Sunda pangolin (*Manis javanica*) and Chinese pangolin (*M. pentadactyla*) were in the top 20 predictions  
239 for both reservoir species (Supplemental Table 4). This result is promising given the much-discussed  
240 discovery of SARS-like betacoronaviruses in *M. javanica*<sup>18</sup>. The Viverridae were also disproportionately  
241 well-represented in the top predictions (Supplemental Figure 5), most notably the masked palm civet  
242 (*Paguma larvata*), which was identified as an intermediate host of SARS-CoV<sup>49,50</sup> (Supplemental Table  
243 4). Our virus sharing model thus captured historic patterns of betacoronavirus spillover and predicted  
244 cross-species transmission from only the phylogeography of east Asian mammals. The opportunity for  
245 inter-species contact depends on both animal behavior and habitat selection, which could be better studied  
246 in natural and anthropogenic habitats for these clades<sup>51</sup>. However, over evolutionary timescales, our  
247 results suggest recombination and diversification of novel betacoronaviruses should be expected among  
248 such taxa in nature, without necessarily requiring further contact via the wildlife trade. For example,  
249 recent observations in Gabon demonstrate cohabitation between pangolins, bats, and various other  
250 mammals (e.g., rodents) in burrows<sup>52</sup>.

251  
252 Moreover, these findings lend credibility to other predictions of SARS-CoV-2 sharing patterns and host  
253 susceptibility. Many of the model's top predictions were mustelids (i.e., ferrets and weasels), and the most  
254 likely viral sharing partner for both *Rhinolophus* species was the hog badger (*Arctonyx collaris*;  
255 Supplemental Table 4). Taken together with reports of SARS-CoV-2 spread in mink farms<sup>53</sup>, these results  
256 highlight the relatively unexplored potential for mustelids to serve as betacoronavirus hosts and as models  
257 for infectivity studies<sup>54</sup>. Similarly, identification of several deer and Old World monkey taxa as high-  
258 probability hosts in our clade-based analysis (Supplemental Figure 3) meshes with the observation of high  
259 binding of SARS-CoV-2 to ACE2 receptors in cervid deer and primates<sup>47</sup>. Felids (especially leopards)  
260 also ranked relatively high in our viral sharing predictions (Supplemental Table 4, Supplemental Figure  
261 5), which is of particular interest given reports of SARS-CoV-2 susceptibility among cats<sup>55</sup>. However, we  
262 caution that this model was the only approach in our ensemble that could generate out-of-sample  
263 prediction across mammals, and therefore its predictions lacked confirmation (and filtering of potential  
264 spurious results) by other models that were designed and implemented independently.

## 265 266 **Discussion**

267  
268 Several limitations apply to our work, most notably the difficulty of empirically verifying predictions.  
269 Although some virological studies have incidentally tested specific hypotheses (e.g., filovirus models and

270 bat surveys<sup>27,56</sup>, henipavirus models and experimental infections<sup>23,57</sup>), model-based predictions are nearly  
271 never subject to systematic verification or post-hoc efforts to identify and correct spurious results. Greater  
272 dialogue between modelers and empiricists is necessary to systematically confront the growing set of  
273 predicted host-virus associations with experimental validation or field observation.

274  
275 Already, we have identified roughly a half-dozen new bat reservoirs of betacoronaviruses that our study  
276 correctly predicted. *Scotophilus heathii*, *Hipposideros larvatus*, and *Pteropus lylei*, all highly predicted  
277 bat species in our out-of-sample rankings, have been reported positive for betacoronaviruses in the  
278 literature<sup>43,58</sup>; however, resulting sequences were not annotated to genus level in GenBank. More recently,  
279 the release of 630 novel bat coronavirus sequences from China included four additional bat hosts  
280 (*Hipposideros pomona*, *Scotophilus kuhlii*, *Myotis pequinus*, and *M. horsfieldii*)<sup>59</sup>. All but *M. horsfieldii*  
281 were correctly identified by the ensemble, and three models correctly identified all seven verification  
282 hosts (Trait-based 1 and 3 and Network-based 1). These results support the idea that our models identified  
283 relevant targets correctly but also highlight an evident limitation of the workflow. Whereas an automated  
284 approach was the ideal method to systematically compile over 30,000 samples on the timescales  
285 commensurate with ongoing efforts to trace SARS-CoV-2 in wildlife, we suggest this discrepancy  
286 highlights the need for careful virological work downstream at every stage of the modeling process,  
287 including the development of hybrid manual-automated data pipelines.

288  
289 Additionally, overcoming underlying model biases that are driven by historical sampling regimes will  
290 require coordinated efforts in field study design. Bat sampling for betacoronaviruses has prioritized viral  
291 discovery<sup>39,40,60–62</sup>, but limitations in the spatial and temporal scale (and replication) of field sampling  
292 have likely created fundamental gaps in our understanding of infection dynamics in bat populations<sup>24</sup>.  
293 Limited longitudinal sampling of wild bats suggests betacoronavirus detection is sporadic over time and  
294 space<sup>58,63</sup>, implying strong seasonality in virus shedding pulses<sup>64</sup>. Carefully tailored spatial and temporal  
295 sampling efforts for priority taxa identified here, within the *Rhinolophus* genus or other high-prediction  
296 bat clades, will be key to identifying the environmental drivers of betacoronavirus shedding from wild  
297 bats and possible opportunities for contact between bats, intermediate hosts, and humans.

298  
299 Future field studies will undoubtedly be important to understand viral dynamics in bats but are inherently  
300 costly and labor-intensive. These efforts are particularly challenging during a pandemic, as many  
301 scientific operations have been restricted including field studies of bats in some regions to limit possible  
302 viral spillback from humans. However, various alternative efforts could both advance basic virology and  
303 allow testing model predictions. General open access to viral association records, including GenBank  
304 accessions and the upcoming release of the USAID PREDICT program's data, could answer open  
305 questions and allow updates to our sampling prioritization (including potentially modeling at subgenus  
306 level, with greater data availability). Appropriately preserved museum specimens and historical  
307 collections, from diverse research programs, also offer key opportunities to retrospectively screen samples  
308 from bats and other mammals for betacoronaviruses and to enhance our understanding of complex host-  
309 virus interactions<sup>65</sup>. Large-scale research networks, such as GBatNet (Global Union of Bat Diversity  
310 Networks; <https://gbatnet.blogspot.com>) and its member networks, could provide diverse samples and  
311 ensure proper partnerships and equitable access and benefit sharing of knowledge across countries<sup>66,67</sup>.  
312 Whole-genome sequencing through initiatives such as the Bat1K Project (<https://bat1k.ucd.ie>) would  
313 facilitate fundamental and applied insights into the immunological pathways by which bats can harbor



314 many virulent viruses without displaying disease<sup>68,69</sup>. Additionally, targeted sequencing efforts could also  
315 identify endogenized viral elements in bat genomes, shedding light on the diversity of bat viruses and the  
316 evolution of bat immune systems<sup>70,71</sup>.

317  
318 To expedite such work, we have made our binary predictions of host-virus associations for all eight  
319 models and all 1,000+ bat species publicly available (Supplementary File 1). Such results are provided  
320 both in the spirit of open science and with the hope that future viral detection, isolation, or experimental  
321 studies might confirm some of these predictions or rule out others<sup>57</sup>. In ongoing collaborative efforts, we  
322 aim to consolidate results from field studies that address these predictions (e.g., serosurveys) and to track  
323 Genbank submissions to expand the known list of betacoronavirus hosts. In several years, we intend to  
324 revisit these predictions as a post-hoc test of model validation, which would represent the first effort to  
325 test the performance of such models and assess their contribution to basic science and to pandemic  
326 preparedness.

327  
328 It is crucial that our predictions be interpreted as a set of hypotheses about potential host-virus  
329 compatibility rather than strong evidence that a particular mammal species is a true reservoir for  
330 betacoronaviruses. In particular, susceptibility is only one aspect of host competence<sup>22,72</sup>, which  
331 encompasses the diverse genetic and immunological processes that mediate within-host responses  
332 following exposure<sup>73</sup>. SARS-CoV-2 in particular may have a broad host range<sup>47</sup>, given hypothesized  
333 compatibility with the ACE2 receptor in many mammal species, but this only adds to the extreme caution  
334 with which any data should be used to implicate a potential wildlife reservoir of the virus, given that rapid  
335 interpretation of inconclusive molecular evidence has likely already generated spurious reservoir  
336 identifications<sup>74,75</sup>. Future efforts to isolate live virus from wildlife or to experimentally show viral  
337 replication would more robustly test whether predicted host species actually play a role in betacoronavirus  
338 maintenance in wildlife<sup>57</sup>.

339  
340 Without direct lines of virological evidence, we note that our sampling prioritization scheme also does not  
341 implicate any given mammal species in SARS-CoV-2 transmission to humans. Care should be taken to  
342 communicate this, especially given the potential consequences of miscommunication for wildlife  
343 conservation. The bat research community in particular has expressed concern that negative framing of  
344 bats as the source of SARS-CoV-2 will impact public and governmental attitudes toward bat  
345 conservation<sup>76</sup>. In zoonotic virus research on bats, studies often over-emphasize human disease risks<sup>77</sup> and  
346 rarely mention ecosystem services provided by these animals<sup>78</sup>. Skewed communication can fuel  
347 negative responses against bats, including indiscriminate culling (i.e., reduction of populations by  
348 selective slaughter)<sup>79</sup>, which has already occurred in response to COVID-19 even outside of Asia (where  
349 spillover occurred)<sup>80</sup>.

350  
351 To minimize potential unintended negative impacts for bat conservation, public health and conservation  
352 responses should act in accordance with substantial evidence suggesting that culling has numerous  
353 negative consequences, not only threatening population viability of threatened bat species in shared  
354 roosts<sup>81</sup> but also possibly increasing viral transmission within the very species that are targeted<sup>82,83</sup>.  
355 Instead, bat conservation programs and long-term ecological studies are necessary to help researchers  
356 understand viral ecology and find sustainable solutions for humans to live safely with wildlife. From  
357 another perspective, policy solutions aimed at limiting human-animal contact could potentially prevent

358 virus establishment in novel species (e.g., as observed in mink farms<sup>53</sup>), especially in wildlife that may  
359 already face conservation challenges (e.g., North American bats threatened by an emerging disease,  
360 white-nose syndrome<sup>79,84</sup>). At least two bat species that can be infected by the fungal pathogen (*Eptesicus*  
361 *fuscus* and *Tadarida brasiliensis*) are in our list of the 239 bat species most likely to be betacoronavirus  
362 hosts.

363

364 Substantial investments are already being planned to trace the wildlife origins of SARS-CoV-2. However,  
365 the intermediate progenitor virus may never be isolated from samples contemporaneous with spillover,  
366 and it may no longer be circulating in wildlife. MERS-CoV circulates continuously in camels<sup>85</sup> and  
367 SARS-CoV persisted in civets long enough to seed secondary outbreaks<sup>49,50</sup>, but the limited description of  
368 Pangolin-CoV symptoms suggests high mortality, potentially indicating a more transient epizootic such  
369 as Ebola die-offs in red river hogs (*Potamochoerus porcus*)<sup>18</sup>. In lieu of concrete data, our study provides  
370 no additional evidence implicating any particular species—or any particular pathway of spillover (e.g.,  
371 wildlife trade, consumption of hunted animals)—as more or less likely. No specific scenario can be  
372 confirmed or rigorously interrogated by ecological models, and we explicitly warn against  
373 misinterpretation or misuse of our findings as evidence for adjacent policy decisions. Although policies  
374 that focus on particular potential reservoir species or target human-wildlife contact could reduce future  
375 spillovers, they will have a negligible bearing on the ongoing pandemic, as SARS-CoV-2 is highly  
376 transmissible within humans (e.g., unlike MERS-CoV or other zoonoses that are sustained in people by  
377 constant reintroduction). SARS-CoV-2 is likely to remain circulating in human populations at least until a  
378 vaccine is developed (if not much longer, given current challenges to vaccine production, allocation,  
379 governance, and uptake), regardless of immediate actions regarding wildlife. COVID-19 response must  
380 be informed by the best consensus evidence available and prioritize solutions that address immediate  
381 reduction of transmission through public health and policy channels. Meanwhile, we hope our proposed  
382 wildlife sampling priorities will help increase the odds of preventing the future emergence of novel  
383 betacoronaviruses.

384

385 **Acknowledgements**

386 We thank Heather Wells for generously sharing thoughtful comments and code. The VERENA  
387 consortium is supported by NSF BII 2021909 and by L’Institut de Valorisation de Données (IVADO)  
388 through Université de Montreal. DJB was supported by an appointment to the Intelligence Community  
389 Postdoctoral Research Fellowship Program at Indiana University, administered by Oak Ridge Institute for  
390 Science and Education through an interagency agreement between the U.S. Department of Energy and the  
391 Office of the Director of National Intelligence. MS was supported by the Research Foundation - Flanders  
392 (FWO17/PDO/067) and the Flemish Government under the “Onderzoeksprogramma Artificiële  
393 Intelligentie (AI) Vlaanderen” program.

394

395  
396  
397  
398  
399  
400  
401  
402  
403  
404  
405  
406

## Figures

**Figure 1. An ensemble of predictive models facilitates identification of likely betacoronavirus bat hosts.** The pairwise Spearman’s rank correlations between models’ ranked species-level predictions were generally substantial and positive (A,B). Models are arranged in decreasing order of their mean correlation with other models. In-sample predictions, expressed as host species’ proportional rank (0 is the most likely host from a given model, 1 is the least likely host), varied significantly due to the uncertainty of network approaches (C). In contrast, species’ proportional ranks were tightly correlated across out-of-sample predictive approaches, which relied on species traits (D). Each line represents a different bat species’ proportional rank across models. The ten species with the highest mean proportional ranks across all models are highlighted in shades of purple.

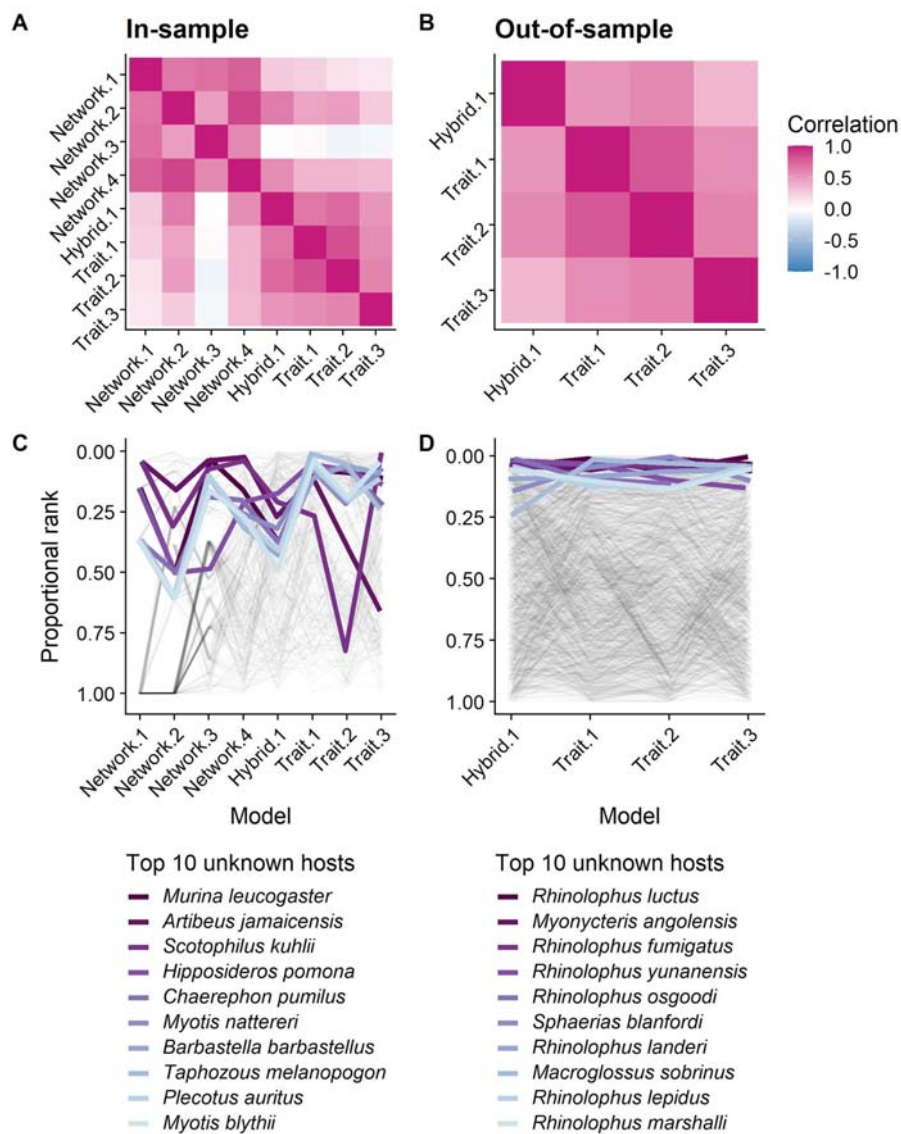

407  
408

409 **Figure 2. Species richness of known and suspected betacoronavirus bat hosts.** Known hosts of  
410 betacoronaviruses (*top*) are found worldwide, but particularly in southern Asia and southern Europe. The  
411 top 50 predicted bat hosts with viral association records (*middle*) are mostly Neotropical, including  
412 several species of vampire bats. In contrast, the top 50 *de novo* bat host predictions based on phylogeny  
413 and ecological traits (*bottom*) are mostly clustered in Myanmar, Vietnam, and southern China, with none  
414 in the Neotropics or North America.  
415

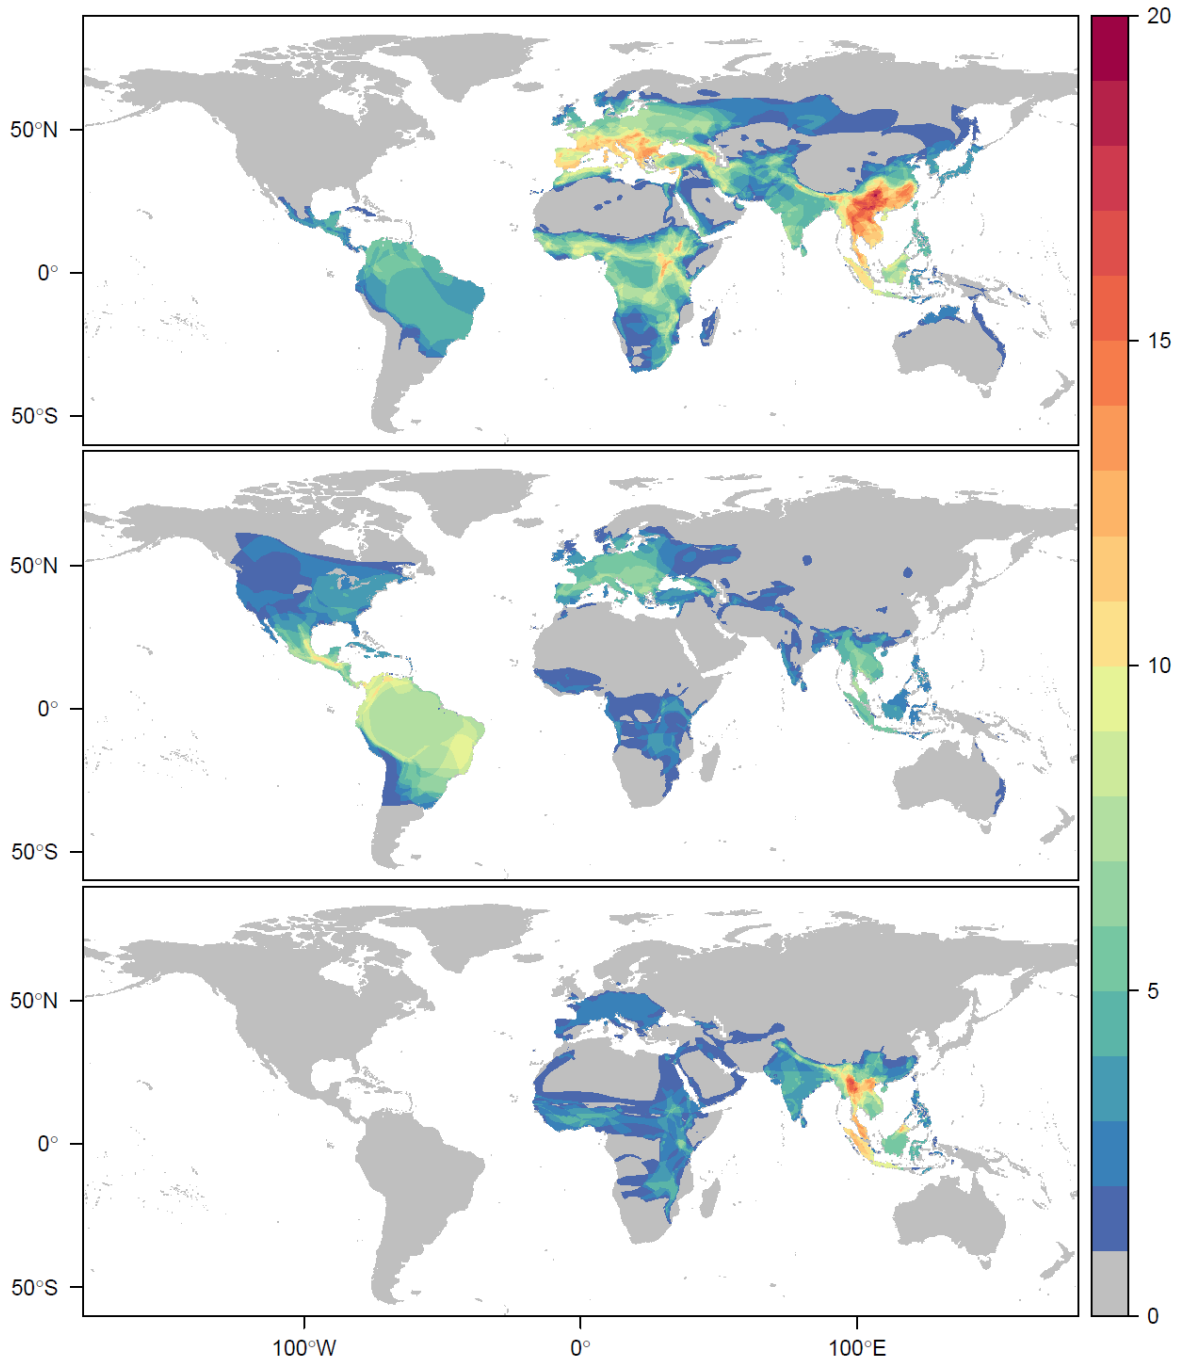

417 **Figure 3. Phylogenetic distribution of predicted bat and mammal hosts of betacoronaviruses.** Bar  
418 height indicates mean predicted rank across the model ensemble (higher values = lower proportional rank  
419 score, more likely to be a host) and black indicates known betacoronavirus hosts. Colored regions indicate  
420 clades identified by phylogenetic factorization as significantly different in their predicted rank compared  
421 to the paraphyletic remainder; those clades more likely to contain a host are shown in red, whereas those  
422 less likely to contain a host are shown in blue. Results are displayed for bats and all mammals separately,  
423 stratified by in- and out-of-sample predictions. Numbers reference clade names, species richness, and  
424 mean predicted ranks as described in Supplemental Tables 1 and 2.  
425

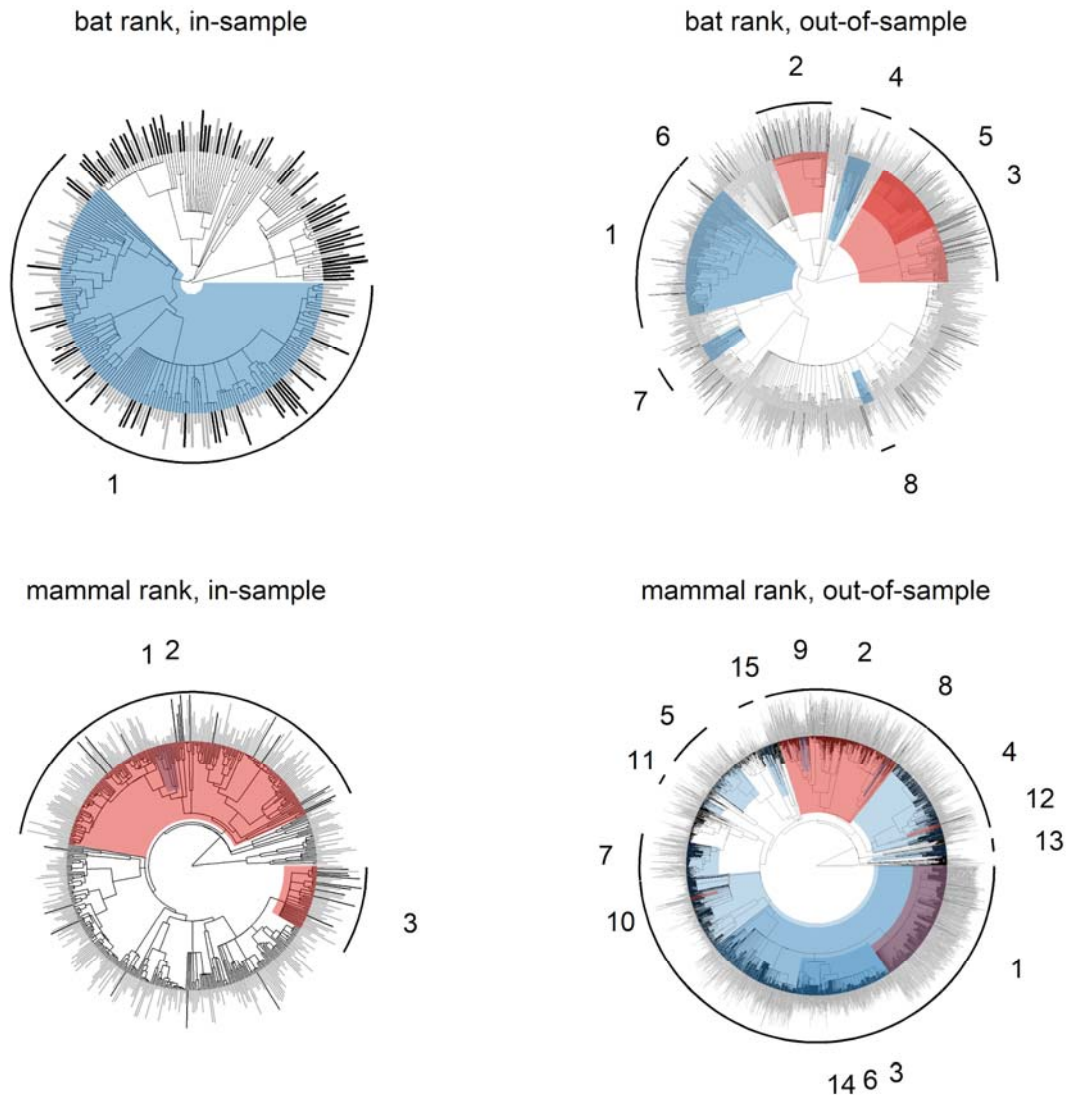

426  
427

428  
429

430  
431  
432  
433  
434  
435  
436  
437  
438  
439  
440  
441  
442  
443  
444  
445  
446  
447  
448  
449  
450  
451  
452  
453  
454  
455  
456  
457  
458  
459  
460  
461  
462  
463  
464  
465  
466  
467  
468  
469  
470  
471  
472  
473

## Methods.

The underlying conceptual aim of this study was to produce and synthesize several different models that predict and rank candidate reservoir species—each with different methods, assumptions, and framings—and to rapidly synthesize these into a consensus list. We broadly structured our study around two modeling targets: (1) produce rankings of likely bat hosts of betacoronaviruses and (2) identify potential non-bat mammal hosts. We developed a novel dataset that merged existing knowledge about the broader mammal-virus network with targeted data collection about coronaviruses; implemented eight modeling methods; synthesized these into an ensemble; and post-hoc identified taxonomic patterns in prediction using phylogenetic factorization.

### Host-Virus Association Data

Entries were downloaded from GenBank on March 27th 2020 using the following search terms: Coronavirus, Coronaviridae, Orthocoronavirinae Alphacoronavirus, Betacoronavirus, Gammacoronavirus, and Deltacoronavirus. Data were sorted using a Python script that saved all available metadata regarding accession number, division, submission date, entry title, organism, genus, genome length, host classification, country, collection date, PubMed ID, journal containing associated publication, publication year, genome completeness, and the gene sequenced. The dataset was cleaned to remove duplicate entries, using GenBank accession number, and entries that did not correspond to viral sequences, using GenBank division. After cleaning, 31,473 entries remained, of which 25,628 had metadata regarding host species.

Data from GenBank were merged with the Host-Pathogen Phylogeny Project (HP3) dataset<sup>30</sup>. The HP3 dataset consists of 2,805 associations between 754 mammal hosts and 586 virus species, compiled from the International Committee on Taxonomy of Viruses (ICTV) database, and manually cleaned over a period of five years. Data collection on HP3 began in 2010 and has been static since 2017, but it still represents the most complete dataset on the mammal virome published with a high standard of data documentation. Several recent studies have used the HP3 dataset to produce statistical models of viral sharing or zoonotic potential<sup>29,48,86</sup>, making it a comparable reference for a multi-model ensemble study.

Because of naming inconsistencies both within GenBank and between the two datasets (HP3 and GenBank), we used a two-step pipeline for taxonomic reconciliation. Viral names were matched to the ICTV 2019 master species list, up to the sub-genus level. Host species names were matched against GBIF using their species API with an automated Julia script, and processed to a fully cleaned set of names. This led to an harmonized dataset representing a global list of mammal-virus associations, from which the bat-coronavirus data can be extracted for downstream and specific modeling efforts. Because the HP3 dataset used an older version of the ICTV master list, and because not all host names in the GenBank metadata could be matched by the GBIF species API (or could be solved unambiguously to the species level), some host-virus interactions were lost; this reinforces the need to careful data curation of taxonomic metadata if they are to enable and support predictive pipelines.

## 474 **Predictor Data**

475

### 476 *Phylogeny*

477

478 We used a supertree of extant mammals to unify modeling approaches incorporating host phylogeny<sup>31</sup>.  
479 Although more recent mammal supertrees exist, we used this particular phylogeny for consistency with  
480 trait datasets and several of the modeling frameworks included in our ensemble. We manually matched  
481 select bat species names between our edge list and this particular phylogeny. This included reverting any  
482 *Dermanura* to their former *Artibeus* designation (i.e., *D. phaeotis*, *D. cinerea*, *D. tolteca*)<sup>87</sup>, switching  
483 *Tadarida* species to either *Mops* or *Chaerephon* species (i.e., *Tadarida condylura* to *Mops condylurus*,  
484 *Tadarida plicata* to *Chaerephon plicatus*, *Tadarida pumila* to *Chaerephon pumilus*)<sup>88</sup>, and renaming  
485 *Myotis pilosus* to the more recent *Myotis ricketti*. *Chaerephon pusillus* was considered its own species but  
486 is now synonymous with *Chaerephon pumilus*<sup>88</sup>. Minor discrepancies between virus data and our  
487 phylogeny were also corrected (*Hipposideros commersonii* to *Hipposideros commersoni* [although more  
488 recently changed to *Macronycteris commersoni*], *Rhinolophus hildebrandti* to *Rhinolophus hildebrandtii*,  
489 *Neoromicia nana* to *Neoromicia nanus*). In other cases, some recently revised genera in our edge list were  
490 modified to match former genera in the mammal supertree: *Parastrellus hesperus* to *Pipistrellus*  
491 *hesperus*, and *Perimyotis subflavus* to *Pipistrellus subflavus*<sup>89</sup>. Lastly, some names in our edge list  
492 missing from the mammal supertree represent former subspecies being raised to full species rank, and  
493 names were reverted accordingly: *Artibeus planirostris* to *Artibeus jamaicensis*, *Miniopterus fuliginosus*  
494 to *Miniopterus schreibersii*, *Triaenops afer* to *Triaenops persicus*, and *Carollia sowelli* to *Carollia*  
495 *brevicauda*. Although we recognize that these are each now recognized as distinct species, in all cases our  
496 synonymized names are thought to be either sister taxa or very closely related.

497

### 498 *Ecological traits*

499

500 We used a previously published dataset of 63 ecological traits describing the morphology, life history,  
501 biogeography, and diet of 1,116 bat species. These data are drawn from a combination of PanTHERIA<sup>32</sup>,  
502 EltonTraits<sup>33</sup>, and the IUCN Red List range maps, and were previously cleaned in a study producing  
503 predictions of bat reservoirs of filoviruses<sup>27</sup>. Four redundant variables (two for human population density,  
504 mean potential evapotranspiration in range, and body mass) were eliminated prior to analyses, favoring  
505 variables with higher completeness.

506

### 507 *Correction for sampling bias*

508

509 To correct for sampling bias, in the style of several previous studies<sup>30,86</sup>, we used the number of peer-  
510 reviewed citations available on a given host as a measure of scientific sampling effort. We used the R  
511 package *easyPubMed* to scrape the number of citations in PubMed returned when searching each of the  
512 1,116 bat names in the trait data on April 10, 2020.

513

## 514 **Modeling Approaches**

515

516 Our team produced an ensemble of eight statistical models (Supplemental Tables 5 and 6), and applied  
517 them to generate a predictive set of eight models for bats and five for other mammals. Four use a



518 network-theoretic component ( $k$ -nearest neighbors, linear filtering, trait-free plug-and-play, and scaled  
519 phylogeny), while three primarily used ecological traits as predictors (boosted regression trees, Bayesian  
520 additive regression trees, and neutral phylogeographic). A final hybrid model used a combination  
521 approach with a network backbone but incorporating the phylogeny and bat trait data.

522

523 All eight approaches were used to generate predictions about potential bat hosts of betacoronaviruses. A  
524 subset of five were used to recommend potential non-bat mammal hosts of betacoronaviruses ( $k$ -nearest  
525 neighbor, linear filtering, scaled phylogeny, trait-free plug-and-play, and neutral phylogeographic). We  
526 did not use trait-based models to predict non-bat hosts, because assigning pseudoabsences to the vast  
527 majority (~3500 or more) of mammal species would likely lead to largely uninformative predictions,  
528 weighed against the 109 known betacoronavirus hosts (79 bats and 30 other mammals).

529

530 *Network model 1: k-nearest neighbors recommender*

531

532 We follow the methodology previously developed for the recommendation of species feeding  
533 interactions<sup>90</sup>. This method builds a recommender system internally based on the  $k$ -nearest neighbor  
534 ( $k$ NN) algorithm, under which candidate hosts are recommended for a virus from a pool constituted by  
535 the hosts of the  $k$  viruses with which it has the greatest overlap. Overlap (host sharing) is measured using  
536 Tanimoto similarity, which is the cardinality of the intersection of two sets divided by the cardinality of  
537 their union. To obtain the pairwise similarity between two viruses, this divides the number of shared hosts  
538 by the cumulative number of hosts. The  $k$ NN of a virus are the  $k$  other viruses with which it has the  
539 highest Tanimoto similarity.

540

541 Hosts are then recommended by counting how many times they appear in these  $k$  neighbors, a quantity  
542 that ranges from 1 to  $k$ . We can impose arbitrary cutoffs by limiting the recommendations to the hosts that  
543 occur in at least  $k$ ,  $k-1$ , etc, viruses. Previous leave-one-out validation of this model revealed that it is  
544 particularly effective for viruses with a reduced number of hosts, which is likely to be the case for  
545 emerging viruses. Furthermore, the performance of this model was not significantly improved by the  
546 addition of functional traits, making it acceptable to run on the association data only.

547

548 This model was run two times: first, by measuring the similarity of viruses, and recommending hosts;  
549 second, by measuring the similarity of hosts, and recommending viruses. In all cases, only results for  
550 betacoronaviruses are reported.

551

552 The outcome of this model should be subject to caution, as leave-one-out validation revealed that the  
553 success rate (i.e., ability to recover one interaction that has been removed) remained lower than 50% even  
554 when using  $k=8$ , and dropped as low as 5% when using  $k=1$  (the nearest-neighbor algorithm). This  
555 strongly suggests that the dataset of reported host-virus associations is extremely incomplete; therefore,  
556 the identification of the nearest neighbors can be biased by under-reported interactions, and this can result  
557 in noise in the prediction. This noise can be particularly important when the  $k$ NN technique operates on  
558 viruses, of which the bat dataset has only 15.

559

560 *Network-based model 2: Linear filter recommender*

561

562 Following Stock *et al.*<sup>91</sup>, we used a previously developed linear filter to infer potential missing  
563 interactions. This recommender system assumes that networks tend to be self-similar, and use this  
564 information to generate a score for an un-observed interaction that is a linear combination of the status of  
565 the interaction (relative weight of 1/4), relative degree of host and virus, and of the observed connectance  
566 of the network (all with relative weights of 1); as we are concerned with ranking interactions as opposed  
567 to examining the absolute value of the score, the penalization coefficient associated to the interaction  
568 being presumed absent could be omitted with no change in the ranking, but has been set to a low value  
569 instead. The scores returned by the linear filter are not directly related to the probability of the interaction  
570 existing in this context, but higher scores still indicate interactions that are more likely to exist. Indeed,  
571 known hosts of betacoronavirus typically scored higher.

572  
573 We used the zero-one-out approach to assess the performance of this model on the entire datasets. In all  
574 cases, non-interactions ranked lower than positive interactions even when entirely removing the  
575 penalization coefficient from the linear filter parameters, which suggests that the network structure  
576 (degree and connectance) is capturing a lot of information as to which species can interact.

577  
578 *Network-based model 3: Plug and play*

579  
580 For network problems, the “plug and play” model is a statistical approach that formulates Bayes’ theorem  
581 for link prediction around the conditional density of traits of known associations compared to traits of  
582 every possible association in a network. The conditional density function is measured by using non-  
583 parametric kernel density estimators (implemented with the R package *np*), and the conditional ratio  
584 between them is used to estimate link “suitability”, a scale-free ratio. Compared to other machine learning  
585 methods that fit training data iteratively, plug and play is comparatively simple, and directly infers the  
586 most likely extensions of observed patterns in data. The plug and play was originally developed to  
587 forecast missing links in host-parasite networks<sup>36</sup>, but has since been used to model species distributions<sup>92</sup>  
588 and predict the global spread of human infectious diseases<sup>93</sup>. We used this model here to estimate  
589 suitability of host-virus interactions by first modeling the entire estimated network of host-virus  
590 interaction suitability, and ranking hosts that are not infected by betacoronaviruses by their estimated  
591 suitability for betacoronaviruses.

592  
593 The “plug and play” model is trained using either matched pairs of host and pathogen ecological,  
594 morphological, or phylogenetic traits<sup>36</sup>, or by using a latent approach<sup>93</sup> which considers the mean  
595 similarity of pathogens in their host ranges and the mean similarity of hosts in their pathogen  
596 communities as ‘traits’. We decided to use the latent approach, as host trait data was far more available  
597 than viral trait data. Further, the taxonomic scale considered for host (species) and virus (genus) differed,  
598 making the resolution of potential trait data different enough to potentially confound trait-based  
599 approaches in this modeling framework.

600  
601 Relative suitability of a host-virus association, as estimated by the “plug and play” model, is formulated  
602 as a density ratio estimation problem. The suitability of a host-virus association is quantified as the  
603 quotient of the distribution of latent trait values when an association was recorded over the distribution of  
604 all the latent trait values. As an attempt to control for sampling effort of mammal and bat host species, we  
605 included PubMed citation counts for host species (as described above) in the estimation of host-virus

606 suitability. We explored host-pathogen suitability using the entire mammal-virus associations dataset, to  
607 maximize the available information on the network's structure, and ranked host-pathogen pairs by their  
608 relative suitability value. From the final predictions, we subset out bat-specific predictions. When  
609 predicting, we set citation counts to the mean of training data, as a sampling bias correction.

610

#### 611 *Network-based model 4: Scaled-phylogeny*

612

613 We apply the network-based conditional model of Elmasri *et al.*<sup>94</sup> for predicting missing links in bipartite  
614 ecological networks. The full model combines a hierarchical Bayesian latent score framework which  
615 accounts for the number of interactions per taxon, and a dependency among hosts based on evolutionary  
616 distances. To predict links based on evolutionary distance, the probability of a host-parasite interaction is  
617 taken as the sum of evolutionary distances to the documented hosts of that parasite. This allocates higher  
618 probabilities when a few closely related hosts, or many distantly related hosts interact with a parasite. In  
619 this way phylogenetic distances are combined with individual affinity parameters per taxa to model the  
620 conditional probability of an interaction.

621

622 In ecological studies, it is common to use time-scaled phylogenies to quantify evolutionary distance  
623 among species<sup>95</sup>. We may use these fixed evolutionary distances for link prediction, but parasite taxa are  
624 known to be more or less constrained by phylogenetic distances among hosts<sup>96</sup>. Further, phylogenies are  
625 hypotheses about evolutionary relationships and have uncertainties in the topology and relative distances  
626 among species<sup>97</sup>. Rather than treating phylogenetic distances as fixed, Elmasri *et al.*<sup>94</sup> re-scale the  
627 phylogeny by applying a macroevolutionary model of trait evolution. While any evolutionary model that  
628 re-scales the covariance matrix may be used, we use the early-burst model, which allows evolutionary  
629 change to accelerate or decelerate through time<sup>98</sup>. This different emphasis to be placed on deep versus  
630 recent host divergences when predicting links.

631

632 We apply the model to a network of associations among host species and viral genera, and the mammal  
633 supertree, which allows us to leverage information from across the network to predict undocumented bat-  
634 betacoronavirus associations. We fit sets of models, applying both the full model, and the phylogeny-only  
635 model to both the bat-viral genera associations, and the mammal-viral genera associations. For each data-  
636 model combination we fit the model using ten-fold cross-validation holding out links for which there is a  
637 minimum of two observed interactions. The posterior interaction matrices resulting from each of the ten  
638 models are then averaged to generate predictions for all links in the network, with betacoronaviruses  
639 subset to generate the ensemble predictions.

640

641 To assess predictive performance, we attempted to predict the held out interactions, and calculated AUC  
642 scores by thresholding predicted probabilities per fold, and taking an average across the 10 folds. In  
643 addition to AUC, we also assessed the model based on the percent of documented interactions accurately  
644 recovered. For the bat-viral genera data the full model resulted in an average AUC of 0.82 and recovered  
645 an average of 90.1% of held out interactions, while the phylogeny-only model showed increased AUC  
646 (0.86), but a decreased proportion of held-out interactions recovered (84.5%). Interestingly, the models  
647 for bat-virus genera associations had marginally worse predictive performance compared to the same  
648 models run on the larger network of mammal-virus associations (full model: AUC 0.88, 84.4% positive  
649 interactions recovered; phylogeny-only model: AUC: 0.88, 88.8% positive interactions recovered),

650 indicating that predicting bat-betacoronavirus associations may benefit from including data on non-bat  
651 hosts. The models also estimated the scaling parameter ( $\eta$ ) of the early-burst model to be positive  
652 (average  $\eta=7.92$  for the full model run on the bat subset), indicating accelerating evolution compared to  
653 the input tree (Supplemental Figure 6). This means that recent divergences are given more weight than  
654 deeper ones for determining bat-viral genera associations, which is consistent with recent work on viral  
655 sharing<sup>48,99</sup>.

656

#### 657 *Trait-based model 1: Boosted regression trees*

658

659 Previous work has been highly successful in predicting zoonotic reservoirs using a combination of  
660 taxonomic, ecological, and geographic traits as predictors. This approach has been previously used to  
661 identify wildlife hosts of filoviruses<sup>27,100</sup>, flaviviruses<sup>28,101</sup>, henipaviruses<sup>23</sup>, *Borrelia burgdorferi*<sup>26</sup>, to  
662 predict mosquito vectors of flaviviruses<sup>102</sup>, and to predict rodent reservoirs and tick vectors of zoonotic  
663 viruses<sup>37,103</sup>. These approaches treat the presence of a specific virus (or genus of viruses) or a zoonotic  
664 pathogen as an outcome variable, with negative values given for species not known to be hosts  
665 (pseudoabsences), and use machine learning to identify the characteristics that predispose animals to  
666 hosting pathogens of concern. By predicting the probability that a given pseudoabsence is a false  
667 negative, the method can infer potential undetected or undiscovered host species.

668

669 This approach has almost exclusively been implemented using boosted regression trees (BRT), a  
670 classification and regression tree (CART) machine learning method that became popular a decade ago for  
671 species distribution modeling.<sup>104</sup> Boosted regression trees develop an ensemble of classification trees  
672 which iteratively explain the residuals of previous trees, up to a fixed tree depth (usually between 3 and 5  
673 splits). The incorporation of boosting allows the model, as it is fit, to progressively better explain poorly-  
674 fit cases within training data.

675

676 We used boosted regression trees to identify trait profiles that predict bat hosts of betacoronaviruses,  
677 including all trait predictors from the trait database that met baseline coverage (< 50% missing values)  
678 and variation (< 97% homogenous) thresholds. For all model fitting, we specified a Bernoulli error  
679 distribution for our binary response variable and applied 10-fold cross validation to prevent overfitting (R  
680 package *gbm*). We started by fitting a global model to our full dataset, first specifying learning rate = 0.01  
681 (shrinks the contribution of each tree to the model) and tree complexity = 4 (controls tree depth) as per  
682 default values and subsequently tuning to minimize cross-validation error.

683

684 We reduced the variable set by calling the *gbm.simp()* function, which computes and compares the mean  
685 change in cross-validation error (deviance) produced by dropping different sets of least-contributing  
686 predictors. The final simplified model included 23 variables, plus citation counts, which we added to  
687 correct for sampling bias.

688

689 We applied bootstrapping resampling methods to estimate uncertainty, using our tuned model to fit 1000  
690 replicate models. For each model, training sets were assembled by randomly selecting with replacement  
691 79 bat-coronavirus associations from the set of reported bat hosts and 79 pseudoabsences. Trained models  
692 were used to generate relative influence coefficients for trait predictors and coronavirus host probabilities  
693 across all bat species. Partial dependence plots display relative influence coefficients and bootstrapped

694 confidence intervals for the top ten contributing trait predictors. The medians of host probabilities were  
695 ranked and used to identify the top ten candidate host species. When predicting, we set citation counts to  
696 the mean of training data, as a sampling bias correction.

697

#### 698 *Trait-based model 2: Bayesian additive regression trees*

699

700 A similar workflow to trait-based model 1 was implemented using Bayesian additive regression trees  
701 (BART), an emerging machine learning tool that has similarities to more popular methods like random  
702 forests and boosted regression trees. BART adds several layers of methodological innovation, and  
703 performs well in bakeoffs with other advanced machine learning methods. Several features make BART  
704 very convenient for modeling projects like these, including several easy-to-use implementations in R  
705 packages, built-in capacity to impute and predict on missing data, and easy construction of variable  
706 importance and partial dependence plots.

707

708 Like other classification and regression tree methods, BART assigns the probability of a binary outcome  
709 variable by developing a set of classification trees - in this case, a sum-of-trees model - that split data  
710 (“branches”) and assign values to terminal nodes (“leaves”). Whereas other similar methods generate  
711 uncertainty by adjusting data (e.g. random forests bootstrap training data and fit a tree to each bootstrap;  
712 boosted regression trees are usually implemented with iterated training-test splits to generate confidence  
713 intervals), BART generates uncertainty using an MCMC process. An initial sum-of-trees model is fit to  
714 the entire dataset, and then rulesets are adjusted in a limited and stochastic set of ways (e.g., adding a  
715 split; switching two internal nodes), with the sum-of-trees model backfit to each change. After a burn-in  
716 period, the cumulative set of sum-of-trees models is treated as a posterior distribution. This has some  
717 advantages over other methods, like boosted regression trees or random forests. In particular, posterior  
718 width directly measures model uncertainty (rather than approximating it by permuting training data), and  
719 a single model can be run (instead of an ensemble trained on smaller subsets of training data), allowing  
720 the model to use the full training dataset all at once.<sup>105</sup>

721

722 Unlike many Bayesian machine learning methods, BART is easily implemented out-of-the-box, due to a  
723 limited set of customization needs. Three main priors control the fitting process: one usually-uniform  
724 prior on variable importance, one two-parameter negative power distribution on tree depth (preventing  
725 overfitting), and an inverse chi-squared distribution on residual variance. A set of well-performing priors  
726 from the original BART study<sup>106</sup> are widely used across R implementations for out-of-the-box settings,  
727 but can be further adjusted relative to modeling needs. In this study, we implemented BART models  
728 using a Dirichlet prior for variable importance (DART), a specification that is designed for situations with  
729 high dimensionality data that probably reflects a small number of true informative predictors. This often  
730 produces a much more reduced model without going through a stepwise variable selection process, which  
731 can be slow and very subject to stochasticity.<sup>105</sup>

732

733 We implemented this approach using the *BART* package in R, using the bat-virus association dataset to  
734 generate an outcome variable, and the bat traits dataset as predictors. BART models were implemented  
735 with 200 trees and 10,000 posterior draws, using every trait feature that was at least 50% complete and <  
736 97% homogenous (taken from TBM1).

737

738 We tried four total implementations, based on two decisions: BART uncorrected and corrected for  
739 citation counts (BART-u, BART-c), and DART uncorrected and corrected for citation counts (DART-u,  
740 DART-c). All four models performed well, with little variation in predictive power measured by the area  
741 under the receiver operator curve calculated on training data (BART-u: AUC = 0.93; BART-c: AUC =  
742 0.93; DART-u: AUC = 0.93; DART-c: 0.90; Supplemental Figure 7). Across all models, spatial variables  
743 had a high importance, including some regionalization (extent of range) and some variables capturing  
744 larger geographic range sizes, as did a diet of invertebrates (pulling out the phylogenetic signal of  
745 insectivorous bats; Supplemental Figure 8).

746  
747 All models identified a number of “false negative” hosts that would be suitable based on a 10% false  
748 negative classification threshold for known betacoronavirus hosts (implemented with the R package  
749 ‘PresenceAbsence’). BART-u identified 217 missing hosts, BART-c identified 279 missing hosts, DART-  
750 u identified 222 missing hosts, and DART-c identified 384 missing hosts, suggesting that this model most  
751 penalized overfitting as intended. As a result, we considered this model the most rigorous and powerful  
752 for inference, and used DART-c in the final model ensemble. We predicted across all 1,040 bats without  
753 recorded betacoronavirus associations, and ranked predicted probability. When predicting, we set citation  
754 counts to the mean of training data, as a sampling bias correction.

755

### 756 *Trait-based model 3: Phylogeographic neutral model*

757  
758 We used a previously published pairwise viral sharing model<sup>48</sup> to predict potential betacoronavirus hosts  
759 based on the sharing patterns of known hosts in a published dataset<sup>30</sup>. We used a generalised additive  
760 mixed model (GAMM), which was fitted in the first half of 2019 using the *mgcv* package, with pairwise  
761 binary viral sharing (0/1 denoting if a species shares at least one virus) as a response variable.  
762 Explanatory variables include pairwise proportional phylogenetic distance and geographic range overlap  
763 (taken from the IUCN species ranges), with a multi-membership random effect to control for species-  
764 level sampling biases. The model was then used to predict the probability that a given species pair share  
765 at least one virus across 4196 placental mammals with available data, producing a predicted viral sharing  
766 network that recapitulates a number of known macroecological patterns, as well as predicting reservoir  
767 hosts with surprising accuracy<sup>48</sup>. Subsetting this predicted sharing matrix, we listed the rank order of hosts  
768 most likely to share with all known betacoronavirus hosts in our datasets.

769

### 770 *Rhinolophus-specific implementation of trait-based model 3*

771  
772 We then repeated this process with sharing patterns of *Rhinolophus affinis* and *R. malayanus* specifically.  
773 Given the strong phylogenetic effect, the top 139 predictions were bat species: predominantly  
774 rhinolophids and hipposiderids. The top 20 predictions for both *R. malayanus* and *R. affinis* are displayed  
775 in Supplemental Tables 3 and 4. Notable predictions included the hog badger *Arctonyx collaris*  
776 (Carnivora: Mustelidae), which was examined for SARS-CoV antibodies in 2003 and is reported in  
777 wildlife markets<sup>7,107</sup>; a selection of civet cats (Carnivora: Viverridae) including *Viverra* species; the  
778 binturong (*Arctitis binturong*); and the masked palm civet (*Paguma larvata*), the latter of which were  
779 implicated in the chain of emergence for SARS-CoV<sup>49,50</sup>; and pangolins (Pholidota: Manidae) including  
780 *Manis javanica* and *Manis pentadactyla*, which have been hypothesised to be part of the emergence chain  
781 for SARS-CoV-2<sup>18,19</sup>.

782

783 Alongside these high-ranked species-level predictions, we visually examined how predictions varied  
784 across all mammal orders and families using the whole dataset (Supplemental Figure 5). Pangolins  
785 (Pholidota), treeshrews (Scandentia), carnivores (Carnivora), hedgehogs (Erinaceomorpha), and even-  
786 toed ungulates (Artiodactyla) had high mean predicted probabilities. Investigating family-level sharing  
787 probabilities revealed that civets (Viverridae) and mustelids (Mustelidae) were responsible for the high  
788 Carnivora probabilities, and mouse deer (Tragulidae) and bovids (Bovidae) were mainly responsible for  
789 high probabilities in the Artiodactyla (Supplemental Figure 5).

790

### 791 *Hybrid model 1: Two-Step Kernel Ridge Regression*

792

793 To make predictions using both the traits and the phylogeny of the hosts, we used Two-Step Kernel Ridge  
794 Regression (TSKRR), a kernel-based pairwise learning method<sup>108,109</sup>. This method can predict interactions  
795 between two species, i.e., hosts and viruses, both in-sample and out-of-sample. Conceptually, TSKRR  
796 performs nonlinear regression twice: once to generalize to new hosts and once to generalize to new  
797 viruses (Supplemental Figure 9A). As a kernel method, it can exploit arbitrary similarity measures to  
798 describe the species. At the same time, its conceptual simplicity permits using efficient shortcuts for  
799 tuning and specialized cross-validation.

800

801 For the hosts, we again restricted ourselves to bats. First, we inputted missing trait values using the  
802 *MissForest* package<sup>110</sup>. We then selected the relevant traits, standardized them, and computed the squared  
803 Euclidean distance. We plugged this distance into a standard radial basis kernel<sup>111</sup>, where we used the  
804 median heuristic to set the bandwidth. Similarly, for the bat phylogeny, we computed the distance matrix.  
805 We combined this distance with the radial basis kernel, again setting the bandwidth by the median of the  
806 distances. Bats were described using a kernel matrix derived from traits, phylogeny, or the average of  
807 both (Supplemental Figure 9B). We corrected for sampling bias by including the number of citations per  
808 species as a covariate and predicted using the average number of citations for all hosts. For viruses, we  
809 used a simple kernel with a “1” if two virus genera belong to the same family, and a “0” otherwise. For all  
810 the kernel matrices, we added 0.1 to each element and an additional 0.1 to the diagonal elements. This  
811 modification serves as an intercept and it gives the TSKRR the same capacity as the linear filtering  
812 method described earlier<sup>108</sup>.

813

814 We fitted the models using the R package *xnet*. We assessed model performance in two ways. First, we  
815 used leave-one-out for every element of the incidence matrix and computed the AUC over all predicted  
816 interactions. Secondly, we used leave-one-out cross-validation on bats(i.e., leaving out a single species,  
817 making predictions for all the viruses of that bat, and repeating this for every species). In this setting, we  
818 computed the AUC for every virus over all bats and averaged these values (Supplemental Figure 9C). For  
819 both evaluation strategies, we removed viruses with no hosts in the dataset, although we kept these for  
820 training the model (Supplementary Table 7). Compared to the average performance for the viruses,  
821 betacoronaviruses were slightly more difficult to predict. Phylogeny was slightly more informative than  
822 traits, although the effect between them was synergistic. As would be expected, it was easier to predict  
823 missing interactions than to predict new hosts.

824

825 To assess which variables are most important, we computed feature importance based on random  
826 permutations. We randomly reshuffled one or both of the bats' kernel matrices, destroying its information  
827 content. Subsequently, we recorded the decrease in AUC for the setting 'interactions' in the model as an  
828 indication of relative importance. We also randomly reshuffled each trait separately and monitored the  
829 effect on performance. We repeated each random permutation 100 times. Reshuffling the complete kernel  
830 matrix with both traits and phylogeny resulted in the largest average drop in AUC of 0.1904  
831 (Supplementary Figure 10). Reshuffling only the phylogeny kernel matrix had a much more profound  
832 impact than the trait matrix (0.07769 vs. 0.05301). Contributions of traits were smaller by comparison.  
833 Citation count was the largest effect (0.02119), with diet breadth (0.00520), population group size  
834 (0.003802), and annual birth pulse (0.0022944) as the remaining largest contributions. Removing  
835 citations resulted in a stronger importance for these variables but did not change the relative importance.

836

### 837 **Consensus Methods and Recommendations**

838

#### 839 *Combining and ranking predictions*

840

841 For all eight models predicting bat hosts of betacoronaviruses, and five models predicting mammal hosts  
842 of betacoronaviruses, we combined predictions—generated using the same standardized data—into one  
843 standardized dataset. All mammal models were trained on data including bats, but predictions were subset  
844 to exclude bats to focus on likely intermediate hosts.

845

846 Each study's unique output—a non-intercomparable mix of different definitions of suitability or  
847 probability of association—were transformed into proportional rank, where lower rank indicates higher  
848 evidence for association out of the total number of hosts examined. By rescaling all results to proportional  
849 ranks between zero and one, we also allowed comparison of in-sample and out-of-sample predictions  
850 across all models. Proportional ranks were averaged across models to generate one standardized list of  
851 predictions. This absorbed much of the variation in model performance (Supplemental Figure 1) and  
852 produced a set of rankings that performed well.

853

854 We elected not to withhold any “test” data to measure model performance, given that each method  
855 deployed in the ensemble has been independently and rigorously tested and validated in previous  
856 publications. Instead, to maximize the amount of available training data for every model, we used full  
857 datasets in each model and measured performance on the full training data.

858

859 For bats, the final ensemble of models spanned a large range of performance on the training data,  
860 measured by the area under the receiver operator curve (AUC; Network 1: 0.624; Network 2: 0.987;  
861 Network 3: 0.514; Network 4: 0.726; Trait 1: 0.850; Trait 2: 0.902; Trait 3: 0.762; Hybrid 1: 0.924),  
862 indicating that it was possible to suitably detect differences in model performance on the full data. The  
863 total ensemble of proportional ranks performed medium well (AUC = 0.832). We used known  
864 betacoronavirus associations to threshold each model and the ensemble predictions based on a 10%  
865 omission threshold (90% sensitivity), and we again found a wide range in the number of predicted  
866 undiscovered bat hosts of betacoronaviruses (Network 1: 162 species; Network 2: 1; Network 3: 111;  
867 Network 4: 44; Trait 1: 425; Trait 2: 384; Trait 3: 720; Hybrid 1: 181; total ensemble: 239 species). Given



868 concerns about mammal model performance and biological accuracy (see Main Text), we elected not to  
869 apply this exercise to mammal hosts at large.

870  
871 To visualize the spatial distribution of predicted bat hosts, we used the IUCN Red List database of species  
872 geographic distributions. We took the top 50 ranked in-sample predictions and top 50 ranked out-of-  
873 sample predictions and combined these range maps to visualize species richness of top predicted hosts  
874 (Figure 3).

875  
876 *Phylogenetic factorization of ensemble models*

877  
878 We used phylogenetic factorization to flexibly identify taxonomic patterns in the consensus proportional  
879 rankings of likely hosts of SARS-CoV-2. Phylogenetic factorization is a graph-partitioning algorithm that  
880 iteratively partitions a phylogeny in a series of generalized linear models to identify clades at any  
881 taxonomic level (e.g., rather than *a priori* comparing strictly among genera or family) that differ in a trait  
882 of interest<sup>45</sup>. Using the mammal supertree, we used the *phylofactor* package to partition proportional rank  
883 as a Gaussian-distributed variable. We determined the number of significant phylogenetic factors using a  
884 Holm's sequentially rejective 5% cutoff for the family-wise error rate. We applied this algorithm across  
885 our four final ensemble prediction datasets: in-sample bat ranks, out-of-sample bat ranks, in-sample  
886 mammal ranks, and out-of-sample mammal ranks.

887  
888 Using network and trait-based models within-sample, we identified only one bat clade with substantially  
889 different consensus proportional rankings, the Yangochiroptera ( $x_{\square}=0.55$  compared to 0.39 for the  
890 remaining bat phylogeny, the Yinpterochiroptera). Out of sample, using only trait-based models, we  
891 instead identified eight bat clades with different propensities to include unlikely or likely bat hosts of  
892 betacoronaviruses. Subclades of the New World superfamily Noctilionoidea broadly had higher  
893 proportional ranks ( $x_{\square}=0.73$ ), indicating lower predicted probability of being hosts, as did the  
894 Emballanuridae ( $x_{\square}=0.75$ ). In contrast, both the Rhinolophidae and the Pteropodidae broadly had lower  
895 mean ranks ( $x_{\square}=0.29$  and  $x_{\square}=0.38$ ).

896  
897 Using network models within-sample across non-volant mammals, we identified four clades with  
898 different proportional ranks. The largest clade was the Laurasiatheria (Artiodactyla, Perissodactyla,  
899 Carnivora, Pholidota, Soricomorpha, and Erinaceomorpha), which had lower proportional ranks (higher  
900 risk;  $x_{\square}=0.55$ ). Nested within this clade, the Cetacea had greater proportional ranks ( $x_{\square}=0.89$ ),  
901 indicating lower risk. A large subclade of the Murinae (Old World rats and mice) also had lower ranks  
902 ( $x_{\square}=0.52$ ). Out of sample, using only the biogeographic viral sharing model, we instead identified 15  
903 clades with different proportional ranks. The first clade identified large swaths of the Muridae as having  
904 higher risk ( $x_{\square}=0.38$ ) as well as the Laurasiatheria ( $x_{\square}=0.50$ ). Old World primates had weakly lower risk  
905 ( $x_{\square}=0.65$ ), as did the Scuridae ( $x_{\square}=0.67$ ). The Cetacea and Pinnipedia both had greater proportional  
906 ranks ( $x_{\square}=0.89$  and  $x_{\square}=0.71$ ). Old World porcupines (Hystricidae) and the Erinaceidae (Paraechinus,  
907 Hemiechinus, Mesechinus, Erinaceus, Atelerix) both had greater risk ( $x_{\square}=0.48$  and  $x_{\square}=0.39$ ), while the  
908 Afrosoricida had higher ranks ( $x_{\square}=0.97$ ).

909  
910 To assess potential discrepancy between taxonomic patterns in model ensemble predictions and those of  
911 simply host betacoronavirus status itself, we ran a secondary phylogenetic factorization treating host

912 status as a Bernoulli-distributed variable, with the same procedure applied to determine the number of  
913 significant phylogenetic factors. To assess sensitivity of taxonomic patterns to sampling effort, we ran  
914 phylogenetic factorization with and without square-root transformed PubMed citations per species as a  
915 weighting variable (Supplemental Figure 11).

916  
917 Without accounting for study effort, phylogenetic factorization of betacoronavirus host status identified  
918 one significant clade across the bat phylogeny, the Yangochiroptera, as having fewer positive species  
919 (4.71%) than the paraphyletic remainder (12.12%). When accounting for study effort, however, the single  
920 clade identified by phylogenetic factorization changed, with a subclade of the family Pteropodidae (the  
921 Rousettinae) having a greater proportion of positive species (28.6%). For non-volant mammals,  
922 phylogenetic factorization identified only one clade, the family Camelidae, as having more positive  
923 species (75%) than the tree remainder (0.68%).

924  
925 *Phylogenetic factorization of Rhinolophidae virus sharing*

926  
927 Because phylogenetic patterns in predictions from our viral sharing model could vary across other  
928 taxonomic scales beyond order and family, we also used phylogenetic factorization to more flexibly  
929 identify host clades with different propensities to share viruses with *R. affinis* and *R. malayanus*. We  
930 partitioned rank as a Gaussian-distributed variable and again determined the number of significant  
931 phylogenetic factors using Holm's sequentially rejective 5% cutoff.

932  
933 Within the Chiroptera, we identified 10 clades with different propensities to share viruses with *R. affinis*  
934 and 5 clades with different propensities to share viruses with *R. malayanus*. For both bats, the top clade  
935 was the family Rhinolophidae, reinforcing phylogenetic components of the biogeographic model and  
936 highlighting the greater likelihood of viral sharing (mean rank  $x_{\square}=40$  for *R. affinis*,  $x_{\square}=42$  for *R.*  
937 *malayanus*). For *R. affinis*, several individual bat species had lower risks of viral sharing (e.g., *Myotis*  
938 *leibii*,  $x_{\square}=4100$ ; *Pteropus insularis*,  $x_{\square}=3157$ ; *Nyctimene aello*,  $x_{\square}=2497$ ; *Chaerephon chapini*,  
939  $x_{\square}=2497$ ). The Megadermatidae, Nycteridae, and Hipposideridae (under which the PanTHERIA dataset  
940 includes the genus *Rhinonictoris*, although this is now considered a separate family, the  
941 Rhinonycteridae<sup>112</sup>) collectively had greater likelihood of viral sharing ( $x_{\square}=557$ ), as did the  
942 Vespertilionidae ( $x_{\square}=704$ ).

943  
944 Across the non-volant mammals, we identified 7 clades with different propensities to share viruses with  
945 *R. affinis* and only 1 clade with different propensities to share viruses with *R. malayanus*. For both bat  
946 species, the first and primary clade was the Ferungulata (Artiodactyla, Perissodactyla, Carnivora,  
947 Pholidota, Soricomorpha, and Erinaceomorpha), which had lower ranks (higher viral sharing;  $x_{\square}=2084$ ).  
948 For viral sharing with *R. affinis*, the Sciuridae was more likely to share viruses ( $x_{\square}=1948$ ), as was the  
949 Scandentia ( $x_{\square}=1416$ ) and many members of the Colobinae ( $x_{\square}=1958$ ). However, members of the tribe  
950 Muntiacini (genera *Elaphodus* and *Muntiacus*) had especially high likelihoods of viral sharing and low  
951 rank ( $x_{\square}=361$ ).

952  
953 **Data and Code Availability**

954

955 The standardized data on betacoronavirus associations, and all associated predictor data, is available from  
956 the VERENA consortium's Github ([github.com/viralemergence/virionette](https://github.com/viralemergence/virionette)). All modeling teams  
957 contributed an individual repository with their methods, which are available in the organizational  
958 directory ([github.com/viralemergence](https://github.com/viralemergence)). All code for analysis, and a working reproduction of each  
959 authors' contributions, is available from the study repository ([github.com/viralemergence/Fresnel](https://github.com/viralemergence/Fresnel)).

960  
961  
962  
963  
964  
965  
966  
967  
968

## Supplemental Material

**Supplemental Table 1. Results of phylogenetic factorization applied to predicted rank probabilities for bats.** The number of retained phylogenetic factors (following a 5% family-wise error rate applied to GLMs), taxa corresponding to those clades, number of species per clade, and mean predicted rank probabilities for the clade compared to the paraphyletic remainder are shown stratified by models applied in- and out-of-sample.

| Sample | Factor | Taxa                                                                                                                                                            | Tips | Clade | Other |
|--------|--------|-----------------------------------------------------------------------------------------------------------------------------------------------------------------|------|-------|-------|
| in     | 1      | Yangochiroptera                                                                                                                                                 | 160  | 0.550 | 0.393 |
| out    | 1      | Mystacinidae, Noctilionidae, Mormoopidae, Phyllostomidae                                                                                                        | 161  | 0.730 | 0.483 |
| out    | 2      | Rhinolophidae                                                                                                                                                   | 73   | 0.295 | 0.538 |
| out    | 3      | Pteropodidae                                                                                                                                                    | 173  | 0.379 | 0.548 |
| out    | 4      | Mosia, Emballonura, Coleura, Rhynchonycteris, Cyttarops, Diclidurus, Centronycteris, Cormura, Saccopteryx, Balantiopteryx, Peropteryx                           | 31   | 0.755 | 0.512 |
| out    | 5      | Eonycteris, Macroglossus, Syconycteris, Notopteryx, Melonycteris, Harpyionycteris, Aproteles, Dobsonia, Styloctenium, Neopteryx, Pteralopex, Acerodon, Pteropus | 99   | 0.458 | 0.527 |
| out    | 6      | Thyropteridae, Furipteridae, Natalidae                                                                                                                          | 12   | 0.818 | 0.517 |
| out    | 7      | Otomops, Promops, Molossus, Eumops                                                                                                                              | 26   | 0.669 | 0.517 |
| out    | 8      | Lasiurus                                                                                                                                                        | 15   | 0.717 | 0.518 |

969  
970

971 **Supplemental Table 2. Results of phylogenetic factorization applied to predicted rank probabilities**  
 972 **for all mammals.** The number of retained phylogenetic factors (following a 5% family-wise error rate  
 973 applied to GLMs), taxa corresponding to those clades, number of species per clade, and mean predicted  
 974 rank probabilities for the clade compared to the paraphyletic remainder are shown stratified by models  
 975 applied in- and out-of-sample.  
 976

| Sample | Factor | Taxa                                                                                                                                                                                                                                                                                                                                                                                                                                                                                                                                                                                                                                                                                                                                                                                                                                                                                                                                                                                                                                                                                                                                                                                                                                                                                                                                                 | Tips | Clade | Other |
|--------|--------|------------------------------------------------------------------------------------------------------------------------------------------------------------------------------------------------------------------------------------------------------------------------------------------------------------------------------------------------------------------------------------------------------------------------------------------------------------------------------------------------------------------------------------------------------------------------------------------------------------------------------------------------------------------------------------------------------------------------------------------------------------------------------------------------------------------------------------------------------------------------------------------------------------------------------------------------------------------------------------------------------------------------------------------------------------------------------------------------------------------------------------------------------------------------------------------------------------------------------------------------------------------------------------------------------------------------------------------------------|------|-------|-------|
| in     | 1      | Phocoenidae, Delphinidae, Tursiops, Monodontidae, Physteridae, Balaenopteridae, Eschrichtiidae                                                                                                                                                                                                                                                                                                                                                                                                                                                                                                                                                                                                                                                                                                                                                                                                                                                                                                                                                                                                                                                                                                                                                                                                                                                       | 12   | 0.889 | 0.611 |
| in     | 2      | Artiodactyla, Perissodactyla, Carnivora, Pholidota, Erinaceomorpha, Soricomorpha                                                                                                                                                                                                                                                                                                                                                                                                                                                                                                                                                                                                                                                                                                                                                                                                                                                                                                                                                                                                                                                                                                                                                                                                                                                                     | 173  | 0.549 | 0.661 |
| in     | 3      | Lophuromys, Micaelamys, Apodemus, Arvicanthis, Bandicota, Madromys, Dasymys, Hydromys, Lemniscomys, Mastomys, Mus, Pelomys, Niviventer, Otomys, Praomys, Rattus, Vandeleuria                                                                                                                                                                                                                                                                                                                                                                                                                                                                                                                                                                                                                                                                                                                                                                                                                                                                                                                                                                                                                                                                                                                                                                         | 38   | 0.520 | 0.627 |
| out    | 1      | Abditomys, Bullimus, Limnomys, Tarsomys, Trypomys, Acomys, Lophuromys, Uranomys, Aethomys, Micaelamys, Anisomys, Chirurmys, Coccymys, Crossomys, Hyomys, Leptomys, Lorentzimys, Pseudohydromys, Paraleptomys, Macruromys, Mallomys, Microhydromys, Parahydromys, Pogonomelomys, Abeomelomys, Solomys, Xenuromys, Apodemus, Tokudaia, Apomys, Crunomys, Chrotomys, Rhynchomys, Arvicanthis, Bandicota, Batomys, Carpomys, Crateromys, Berylmys, Bunomys, Chiromyscus, Chiropodomys, Hapalomys, Haeromys, Colomys, Nilopegamys, Conilurus, Leporillus, Mesembriomys, Melomys, Protochromys, Mammelomys, Paramelomys, Uromys, Zyzomys, Leggadina, Notomys, Pseudomys, Mastacomys, Madromys, Cremnomys, Millardia, Dacnomys, Dasymys, Dephomys, Hybomys, Hydromys, Xeromys, Desmomys, Diomys, Diplothrix, Echiothrix, Margaretamys, Melasmothrix, Tateomys, Eropeplus, Lenomys, Golunda, Grammomy, Thallomys, Hadromys, Heimyscus, Hylomyscus, Komodomys, Papagomys, Oenomys, Thamnomys, Lemniscomys, Lenothrix, Leopoldamys, Malacomys, Praomys, Myomyscus, Mastomys, Maxomys, Micromys, Muriculus, Mus, Mylomys, Pelomys, Stenocephalemys, Nesokia, Niviventer, Otomys, Parotomys, Palawanomys, Paruromys, Phloeomys, Pithecheir, Pogonomys, Rattus, Rhabdomys, Srilankamys, Nesoromys, Stochomys, Sundamys, Taeromys, Vandeleuria, Vernaya, Zelotomys | 510  | 0.382 | 0.672 |
| out    | 2      | Artiodactyla, Perissodactyla, Carnivora, Pholidota                                                                                                                                                                                                                                                                                                                                                                                                                                                                                                                                                                                                                                                                                                                                                                                                                                                                                                                                                                                                                                                                                                                                                                                                                                                                                                   | 505  | 0.495 | 0.651 |
| out    | 3      | Anomaluridae, Pedetidae, Dipodidae, Cricetidae, Muridae, Nesomyidae, Calomyscidae, Spalacidae, Platanthomyidae                                                                                                                                                                                                                                                                                                                                                                                                                                                                                                                                                                                                                                                                                                                                                                                                                                                                                                                                                                                                                                                                                                                                                                                                                                       | 779  | 0.643 | 0.622 |
| out    | 4      | Talpidae, Erinaceomorpha, Soricidae                                                                                                                                                                                                                                                                                                                                                                                                                                                                                                                                                                                                                                                                                                                                                                                                                                                                                                                                                                                                                                                                                                                                                                                                                                                                                                                  | 357  | 0.630 | 0.627 |
| out    | 5      | Cercopithecidae, Hominidae, Hylobatidae                                                                                                                                                                                                                                                                                                                                                                                                                                                                                                                                                                                                                                                                                                                                                                                                                                                                                                                                                                                                                                                                                                                                                                                                                                                                                                              | 139  | 0.649 | 0.626 |

977

978 **Supplemental Table 2, continued.** (Page 2 of 2)

979

| Sample | Factor | Taxa                                                                                                                                                                                                                                                                                                                                                                                                                                                                                                                                                                                                                                                                                                                                                                                                                                                                                                                                                                                      | Tips | Clade | Other |
|--------|--------|-------------------------------------------------------------------------------------------------------------------------------------------------------------------------------------------------------------------------------------------------------------------------------------------------------------------------------------------------------------------------------------------------------------------------------------------------------------------------------------------------------------------------------------------------------------------------------------------------------------------------------------------------------------------------------------------------------------------------------------------------------------------------------------------------------------------------------------------------------------------------------------------------------------------------------------------------------------------------------------------|------|-------|-------|
| out    | 6      | Abrawayaomys, Handleyomys, Aepeomys, Thomasomys, Abrothrix, Akodon, Necromys, Deltamys, Thaptomys, Andalgalomys, Auliscomys, Loxodontomys, Phyllotis, Paralomys, Graomys, Andinomys, Bibimys, Kunsia, Scapteromys, Blarinomys, Calomys, Chelemys, Chilomys, Chinchillula, Delomys, Eligmodontia, Euneomys, Galenomys, Geoxus, Holochilus, Lundomys, Pseudoryzomys, Irenomys, Lenoxus, Melanomys, Microryzomys, Neacomys, Nectomys, Neotomys, Nesoryzomys, Notiomys, Oecomys, Oligoryzomys, Oryzomys, Oxymycterus, Brucepattersonius, Phaenomys, Podoxymys, Punomys, Reithrodon, Rhagomys, Rhipidomys, Scolomys, Sigmodontomys, Thalpomys, Wiedomys, Wilfredomys, Juliomys, Zygodontomys, Anotomys, Chibchanomys, Ichthyomys, Neusticomys, Rheomys, Sigmodon, Nyctomys, Otonyctomys, Ototylomys, Tylomys, Baiomys, Scotinomys, Ochrotomys, Habromys, Neotomodon, Podomys, Osgoodomys, Megadontomys, Peromyscus, Onychomys, Isthmomys, Reithrodontomys, Hodomys, Xenomys, Neotoma, Nelsonia | 397  | 0.703 | 0.616 |
| out    | 7      | Tamiasciurus, Sciurus, Rheithrosciurus, Microsciurus, Syntheosciurus, Pteromys, Petaurista, Belomys, Biswamoyopterus, Trogopterus, Pteromyscus, Aeromys, Eupetaurus, Aeretes, Glaucomys, Eoglaucomys, Hylopetes, Petinomys, Petaurillus, Iomys, Ratufa, Callosciurus, Glyphotes, Lariscus, Menetes, Rhinosciurus, Funambulus, Tamiops, Dremomys, Exilisciurus, Hyosciurus, Prosciurillus, Rubrisciurus, Nannosciurus, Sundasciurus                                                                                                                                                                                                                                                                                                                                                                                                                                                                                                                                                        | 139  | 0.672 | 0.625 |
| out    | 8      | Phocoenidae, Delphinidae, Tursiops, Monodontidae, Physteridae, Balaenopteridae, Eschrichtiidae                                                                                                                                                                                                                                                                                                                                                                                                                                                                                                                                                                                                                                                                                                                                                                                                                                                                                            | 12   | 0.889 | 0.626 |
| out    | 9      | Odobenidae, Otariidae, Phocidae                                                                                                                                                                                                                                                                                                                                                                                                                                                                                                                                                                                                                                                                                                                                                                                                                                                                                                                                                           | 33   | 0.714 | 0.626 |
| out    | 10     | Hystriidae                                                                                                                                                                                                                                                                                                                                                                                                                                                                                                                                                                                                                                                                                                                                                                                                                                                                                                                                                                                | 11   | 0.482 | 0.627 |
| out    | 11     | Caprolagus, Poelagus, Lepus, Oryctolagus                                                                                                                                                                                                                                                                                                                                                                                                                                                                                                                                                                                                                                                                                                                                                                                                                                                                                                                                                  | 33   | 0.642 | 0.627 |
| out    | 12     | Paraechinus, Hemiechinus, Mesechinus, Erinaceus, Atelerix                                                                                                                                                                                                                                                                                                                                                                                                                                                                                                                                                                                                                                                                                                                                                                                                                                                                                                                                 | 15   | 0.388 | 0.628 |
| out    | 13     | Afrosoricida                                                                                                                                                                                                                                                                                                                                                                                                                                                                                                                                                                                                                                                                                                                                                                                                                                                                                                                                                                              | 41   | 0.970 | 0.623 |
| out    | 14     | Castoridae, Heteromyidae, Geomyidae, Octodontidae, Ctenodactylidae, Ctenomyidae, Abrocomidae, Caviidae, Dinomyidae, Petromuridae, Dasyproctidae, Myocastoridae, Echimyidae, Erethizontidae, Capromyidae, Cuniculidae, Thryonomyidae, Bathyergidae, Chinchillidae                                                                                                                                                                                                                                                                                                                                                                                                                                                                                                                                                                                                                                                                                                                          | 295  | 0.872 | 0.603 |
| out    | 15     | Cheirogaleidae, Indriidae, Daubentoniidae, Lemuridae, Lepilemuridae                                                                                                                                                                                                                                                                                                                                                                                                                                                                                                                                                                                                                                                                                                                                                                                                                                                                                                                       | 48   | 0.921 | 0.623 |

980

981 **Supplemental Table 3. Predicted high-similarity bat hosts sharing with *Rhinolophus affinis* and *R.***  
 982 ***malayanus*.** Species on these lists may be particularly likely to be the ultimate evolutionary origin of  
 983 SARS-CoV-2, or a closely-related virus prior to recombination in an intermediate host. Predictions are  
 984 made based just on the average viral sharing probability inferred for the two hosts from the  
 985 phylogeography model (Trait-based 3). (\* Note that the two species have high sharing probabilities with  
 986 each other, potentially indicating that efforts to trace the origins of SARS-CoV-2 are already very close to  
 987 their target.)  
 988

| <b>Rhinolophus affinis</b>                     | <b>Rhinolophus malayanus</b>                  |
|------------------------------------------------|-----------------------------------------------|
| 1. <i>Rhinolophus macrotis</i> (P=0.84)        | 1. <i>Rhinolophus shameli</i> (P=0.87)        |
| 2. <i>Rhinolophus stheno</i> (P=0.83)          | 2. <i>Rhinolophus coelophyllus</i> (P=0.84)   |
| 3. <i>Rhinolophus malayanus</i> (P=0.82)       | 3. <i>Rhinolophus thomasi</i> (P=0.84)        |
| 4. <i>Rhinolophus acuminatus</i> (P=0.81)      | 4. <i>Rhinolophus affinis</i> (P=0.82)        |
| 5. <i>Rhinolophus pearsonii</i> (P=0.78)       | 5. <i>Rhinolophus marshalli</i> (P=0.82)      |
| 6. <i>Rhinolophus shameli</i> (P=0.78)         | 6. <i>Rhinolophus pearsonii</i> (P=0.82)      |
| 7. <i>Rhinolophus thomasi</i> (P=0.78)         | 7. <i>Rhinolophus yunanensis</i> (P=0.79)     |
| 8. <i>Rhinolophus sinicus</i> (P=0.77)         | 8. <i>Rhinolophus paradoxolophus</i> (P=0.78) |
| 9. <i>Rhinolophus trifoliatus</i> (P=0.76)     | 9. <i>Rhinolophus macrotis</i> (P=0.76)       |
| 10. <i>Rhinolophus marshalli</i> (P=0.72)      | 10. <i>Rhinolophus acuminatus</i> (P=0.75)    |
| 11. <i>Rhinolophus shortridgei</i> (P=0.71)    | 11. <i>Rhinolophus siamensis</i> (P=0.75)     |
| 12. <i>Rhinolophus luctus</i> (P=0.7)          | 12. <i>Rhinolophus rouxii</i> (P=0.72)        |
| 13. <i>Rhinolophus sedulus</i> (P=0.7)         | 13. <i>Rhinolophus stheno</i> (P=0.71)        |
| 14. <i>Rhinolophus rouxii</i> (P=0.69)         | 14. <i>Rhinolophus luctus</i> (P=0.69)        |
| 15. <i>Rhinolophus pusillus</i> (P=0.68)       | 15. <i>Rhinolophus trifoliatus</i> (P=0.65)   |
| 16. <i>Rhinolophus ferrumequinum</i> (P=0.67)  | 16. <i>Rhinolophus pusillus</i> (P=0.62)      |
| 17. <i>Rhinolophus lepidus</i> (P=0.67)        | 17. <i>Rhinolophus borneensis</i> (P=0.6)     |
| 18. <i>Hipposideros pomona</i> (P=0.66)        | 18. <i>Hipposideros lylei</i> (P=0.59)        |
| 19. <i>Rhinolophus celebensis</i> (P=0.66)     | 19. <i>Rhinolophus shortridgei</i> (P=0.59)   |
| 20. <i>Rhinolophus paradoxolophus</i> (P=0.66) | 20. <i>Rhinolophus sinicus</i> (P=0.59)       |

989

990 **Supplemental Table 4. Predicted high-similarity non-bat hosts sharing with *Rhinolophus affinis* and**  
 991 ***R. malayanus*.** Species on these lists may be particularly suitable as stepping stones for betacoronavirus  
 992 transmission from bats into humans, including potentially for SARS-CoV-2 and other SARS-like viruses.  
 993 Predictions are made based just on the average viral sharing probability inferred for the two hosts from  
 994 the phylogeography model (Trait-based 3). Species' binomial names are included alongside their families.  
 995

| <i>Rhinolophus affinis</i>              |             | <i>Rhinolophus malayanus</i>            |             |
|-----------------------------------------|-------------|-----------------------------------------|-------------|
| 1. Arctonyx collaris (P=0.33)           | Mustelidae  | 1. Arctonyx collaris (P=0.29)           | Mustelidae  |
| 2. Budorcas taxicolor (P=0.33)          | Bovidae     | 2. Herpestes urva (P=0.28)              | Herpestidae |
| 3. Viverra zangalla (P=0.32)            | Viverridae  | 3. Lutrogale perspicillata (P=0.28)     | Mustelidae  |
| 4. Manis javanica (P=0.3)               | Manidae     | 4. Melogale personata (P=0.27)          | Mustelidae  |
| 5. Mustela altaica (P=0.3)              | Mustelidae  | 5. Viverra megaspila (P=0.26)           | Viverridae  |
| 6. Ursus thibetanus (P=0.3)             | Ursidae     | 6. Arctictis binturong (P=0.25)         | Viverridae  |
| 7. Cynogale bennettii (P=0.29)          | Viverridae  | 7. Euroscaptor klossi (P=0.25)          | Talpidae    |
| 8. Elaphodus cephalophus (P=0.29)       | Cervidae    | 8. Lutra sumatrana (P=0.25)             | Mustelidae  |
| 9. Lutrogale perspicillata (P=0.29)     | Mustelidae  | 9. Sus scrofa (P=0.25)                  | Suidae      |
| 10. Viverricula indica (P=0.29)         | Viverridae  | 10. Capricornis milneedwardsii (P=0.23) | Bovidae     |
| 11. Capricornis sumatraensis (P=0.28)   | Bovidae     | 11. Manis javanica (P=0.23)             | Manidae     |
| 12. Chamarogale himalayica (P=0.28)     | Soricidae   | 12. Manis pentadactyla (P=0.23)         | Manidae     |
| 13. Helarctos malayanus (P=0.28)        | Ursidae     | 13. Mustela nudipes (P=0.23)            | Mustelidae  |
| 14. Herpestes javanicus (P=0.27)        | Herpestidae | 14. Paguma larvata (P=0.23)             | Viverridae  |
| 15. Hylomys suillus (P=0.27)            | Erinaceidae | 15. Panthera pardus (P=0.23)            | Felidae     |
| 16. Mustela kathiah (P=0.27)            | Mustelidae  | 16. Viverra zibetha (P=0.23)            | Viverridae  |
| 17. Capricornis milneedwardsii (P=0.26) | Bovidae     | 17. Bandicota savilei (P=0.22)          | Muridae     |
| 18. Catopuma temminckii (P=0.26)        | Felidae     | 18. Chrotogale owstoni (P=0.22)         | Viverridae  |
| 19. Crocidura negligens (P=0.26)        | Soricidae   | 19. Crocidura fuliginosa (P=0.22)       | Soricidae   |
| 20. Capricornis thar (P=0.25)           | Bovidae     | 20. Crocidura vorax (P=0.22)            | Soricidae   |

996



997 **Supplemental Table 5. Taxonomic scale of model training data and predictive implementation.**

998 Notes: (1) These models generated predictions of sharing with *Rhinolophus affinis* over all non-human  
 999 mammals in the HP3 dataset, then subsetted to bats. (2) In these models, bat-betacoronavirus predictions  
 1000 are based on a subset of binary outcomes for known association with betacoronaviruses, without any other  
 1001 viruses included.  
 1002

| Model approach                                             | Training data scale              | Bat<br><i>Betacoronavirus</i><br>predictions | Mammal-wide<br><i>Betacoronavirus</i><br>predictions |
|------------------------------------------------------------|----------------------------------|----------------------------------------------|------------------------------------------------------|
| <b>Network-based 1</b><br>k-Nearest neighbors              | Bat-virus                        | <input type="checkbox"/>                     |                                                      |
| <b>Network-based 1</b><br>k-Nearest neighbors              | Mammal-virus                     |                                              | <input type="checkbox"/>                             |
| <b>Network-based 2</b><br>Linear filter                    | Bat-virus                        | <input type="checkbox"/>                     |                                                      |
| <b>Network-based 2</b><br>Linear filter                    | Mammal-virus                     |                                              | <input type="checkbox"/>                             |
| <b>Network-based 3</b><br>Plug-and-play                    | Mammal-virus <sup>1</sup>        | <input type="checkbox"/>                     | <input type="checkbox"/>                             |
| <b>Network-based 4</b><br>Scaled-phylogeny                 | Bat-virus                        | <input type="checkbox"/>                     |                                                      |
| <b>Network-based 4</b><br>Scaled-phylogeny                 | Mammal-virus                     |                                              | <input type="checkbox"/>                             |
| <b>Trait-based 1</b><br>Boosted regression trees           | Bat-betacoronavirus <sup>2</sup> | <input type="checkbox"/>                     |                                                      |
| <b>Trait-based 2</b><br>Bayesian additive regression trees | Bat-betacoronavirus <sup>2</sup> | <input type="checkbox"/>                     |                                                      |
| <b>Trait-based 3</b><br>Neutral phylogeographic            | Mammal-virus <sup>1</sup>        | <input type="checkbox"/>                     | <input type="checkbox"/>                             |
| <b>Hybrid 1</b><br>Two-step kernel ridge regression        | Bat-betacoronavirus              | <input type="checkbox"/>                     |                                                      |

1003

1004

1005 **Supplemental Table 6. Data scale of prediction, by method.** Some methods use pseudoabsences to  
 1006 expand the scale of prediction but still only analyze existing data, with no out-of-sample inference, while  
 1007 others can predict freshly onto new data. (\* Training data from the HP3 database uses pseudoabsences,  
 1008 but no new ones are generated in this study that modify the model or the bat-virus association dataset)  
 1009

| <b>Model approach</b>                                      | <b>Prediction on hosts without known associations (out-of-sample)</b> | <b>Predictive extent and use of pseudoabsences</b>                                                                     |
|------------------------------------------------------------|-----------------------------------------------------------------------|------------------------------------------------------------------------------------------------------------------------|
| <b>Network-based 1</b><br>k-Nearest neighbors              | No                                                                    | Only predicts link probabilities among species in the association data                                                 |
| <b>Network-based 2</b><br>Linear filter                    | No                                                                    | Only predicts link probabilities among species in the association data                                                 |
| <b>Network-based 3</b><br>Plug-and-play                    | No                                                                    | Uses pseudoabsences to predict over all mammals in association data, using latent approach                             |
| <b>Network-based 4</b><br>Scaled-phylogeny                 | No                                                                    | Only predicts link probabilities among species in the association data                                                 |
| <b>Trait-based 1</b><br>Boosted regression trees           | Yes                                                                   | Uses pseudoabsences for all bats in trait data to predict over all species, including those without known associations |
| <b>Trait-based 2</b><br>Bayesian additive regression trees | Yes                                                                   | Uses pseudoabsences for all bats in trait data to predict over all species, including those without known associations |
| <b>Trait-based 3</b><br>Neutral phylogeographic            | Yes                                                                   | Trains on a broader network, and predicts sharing probabilities among any mammals in phylogeny and IUCN range map data |
| <b>Hybrid 1</b><br>Two-step kernel ridge regression        | Yes                                                                   | Uses pseudoabsences for all bats in trait data to predict over all species, including those without known associations |

1010  
1011

1012 **Supplemental Table 7. Model performance for hybrid model.** Area under receiver-operator curve for  
1013 predicting interactions, or predicting for betacoronaviruses or for hosts, using bat traits, phylogeny or a  
1014 combination of both.

1015

|                  | <b>interactions</b> | <b>Betacoronavirus</b> | <b>hosts (average)</b> |
|------------------|---------------------|------------------------|------------------------|
| <b>traits</b>    | 0.8784              | 0.6742                 | 0.7304                 |
| <b>phylogeny</b> | 0.8848              | 0.73389                | 0.7623                 |
| <b>both</b>      | 0.8975              | 0.7510                 | 0.7909                 |

1016

1017 **Supplemental Figure 1.** Bat models perform more strongly together than in isolation. Curves show  
1018 observed betacoronavirus hosts against predicted proportional ranks from eight individual models, and  
1019 incorporated into one multi-model ensemble. Black lines show a binomial GLM fit to the predicted ranks  
1020 against the recorded presence or absence of known betacoronavirus associations. Points are jittered to  
1021 reduce overlap.  
1022

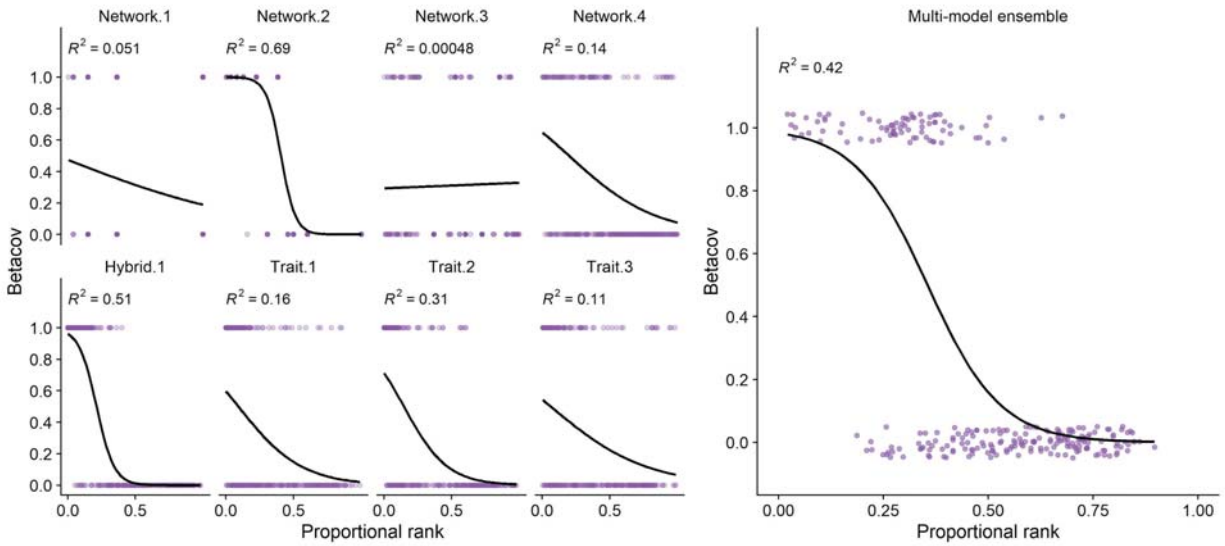

1023

1024 **Supplemental Figure 2.** Poor concordance among predictive models for mammal hosts of  
1025 betacoronaviruses. The pairwise Spearman's rank correlations between models' ranked species-level  
1026 predictions were generally low (A). In-sample predictions varied significantly and heavily prioritized  
1027 domestic animals and well-studied hosts (B). The ten species with the highest mean proportional ranks  
1028 across all models are highlighted in shades of purple. Only in-sample predictions are displayed because  
1029 only one model (Trait-based 3) was able to predict out of sample for all mammals.  
1030

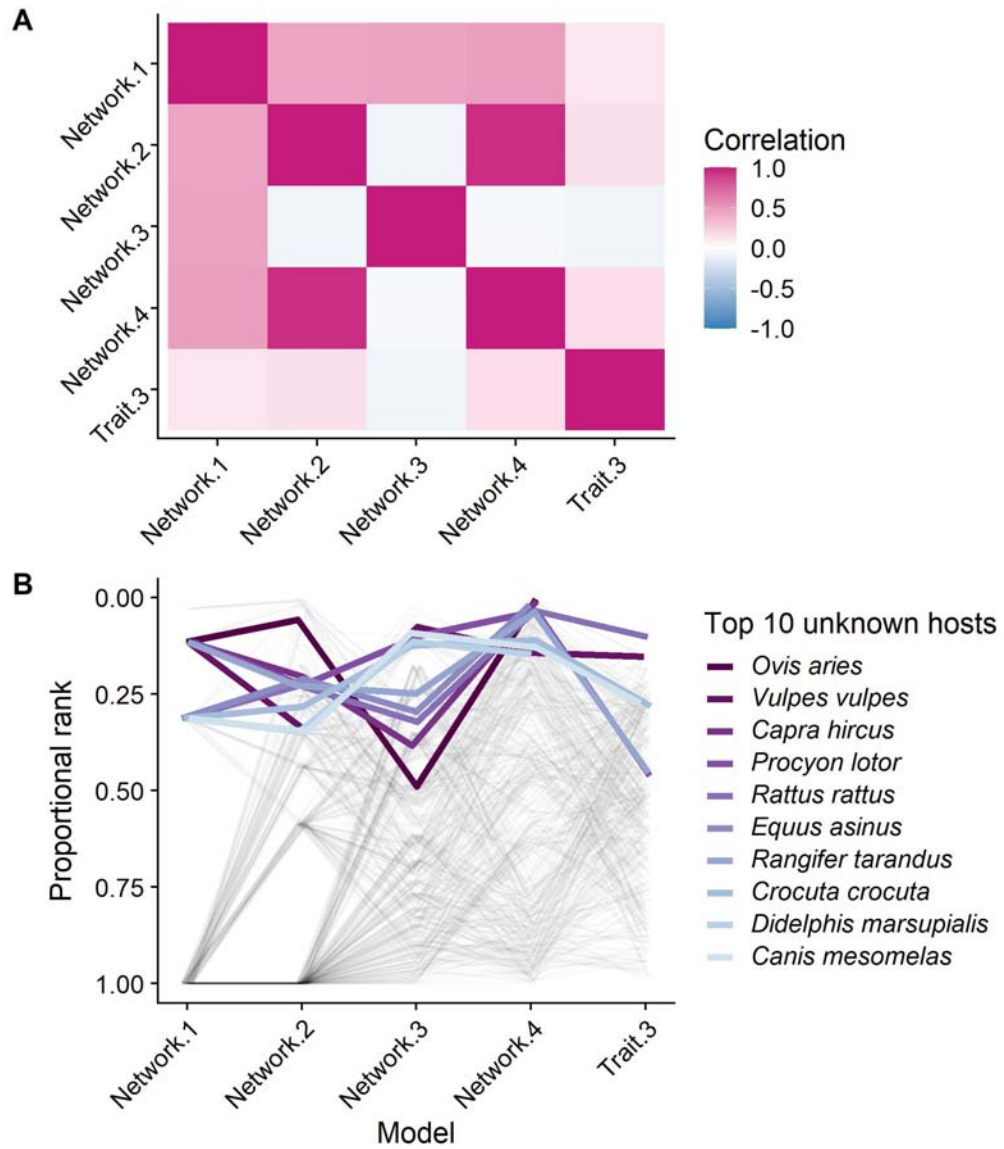

1031

1032 **Supplemental Figure 3.** Results of phylogenetic factorization applied to predicted ranks of virus sharing  
1033 with *Rhinolophus affinis* and *Rhinolophus malayanus*. Colored regions indicate clades identified as  
1034 significantly different in their predicted rank compared to the paraphyletic remainder; those more likely to  
1035 share a virus with the *Rhinolophus* are shown in red, whereas those less likely to share a virus are shown  
1036 in blue. Bar height indicates predicted rank (higher values = lower rank score, more likely share virus).  
1037 Results are displayed for bats and remaining mammals separately. Mammal-wide clades with high  
1038 propensities to share viruses with *R. affinis* based solely on their phylogeography included the treeshrews  
1039 (Scandentia), Old World monkeys (Colobinae), and both tufted and barking deer (Muntiacini).  
1040  
1041

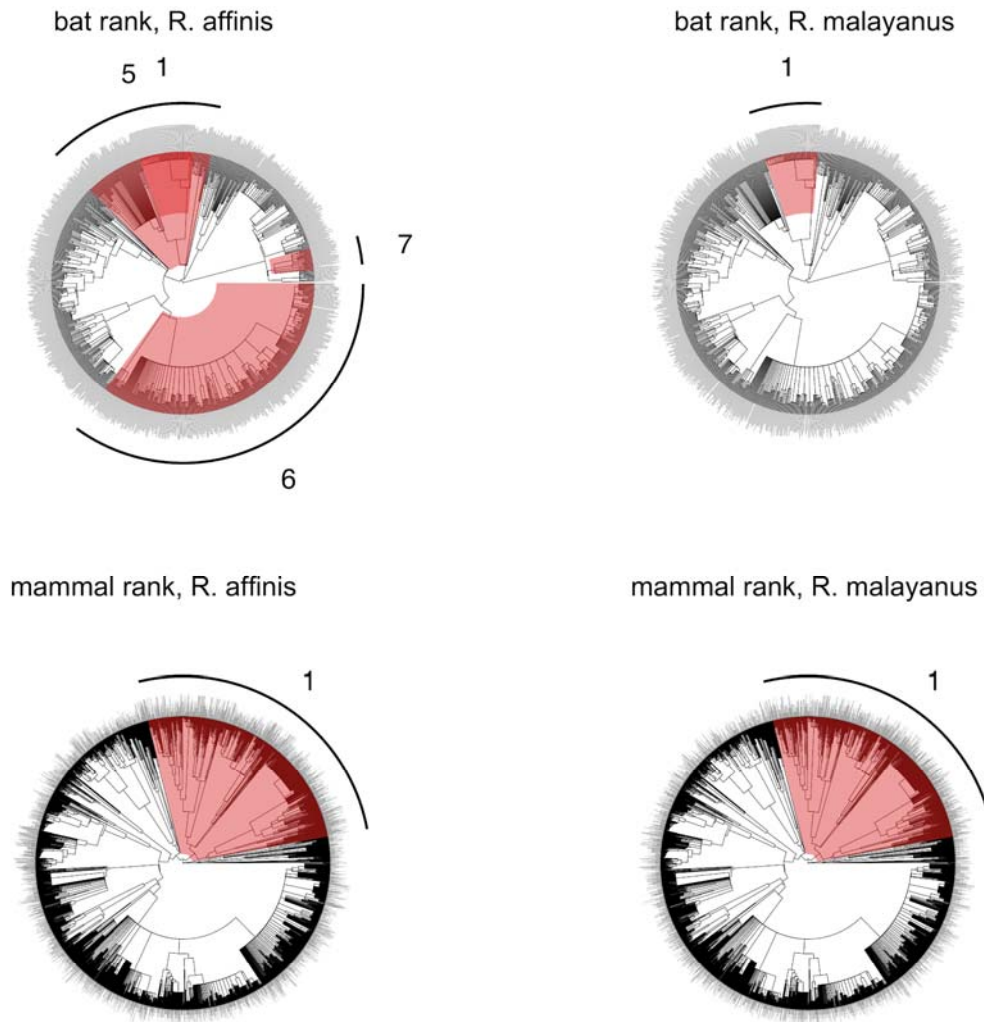

1042

1043 **Supplemental Figure 4.** Predicted species-level sharing probabilities of A) *Rhinolophus affinis* and B)  
1044 *Rhinolophus malayanus*, calculated according to the phylogeographic viral sharing model<sup>48</sup>. Each  
1045 coloured point is a mammal species. Black points and error bars denote means and standard errors for  
1046 each order. Mammal orders are arranged according to their mean sharing probability.  
1047

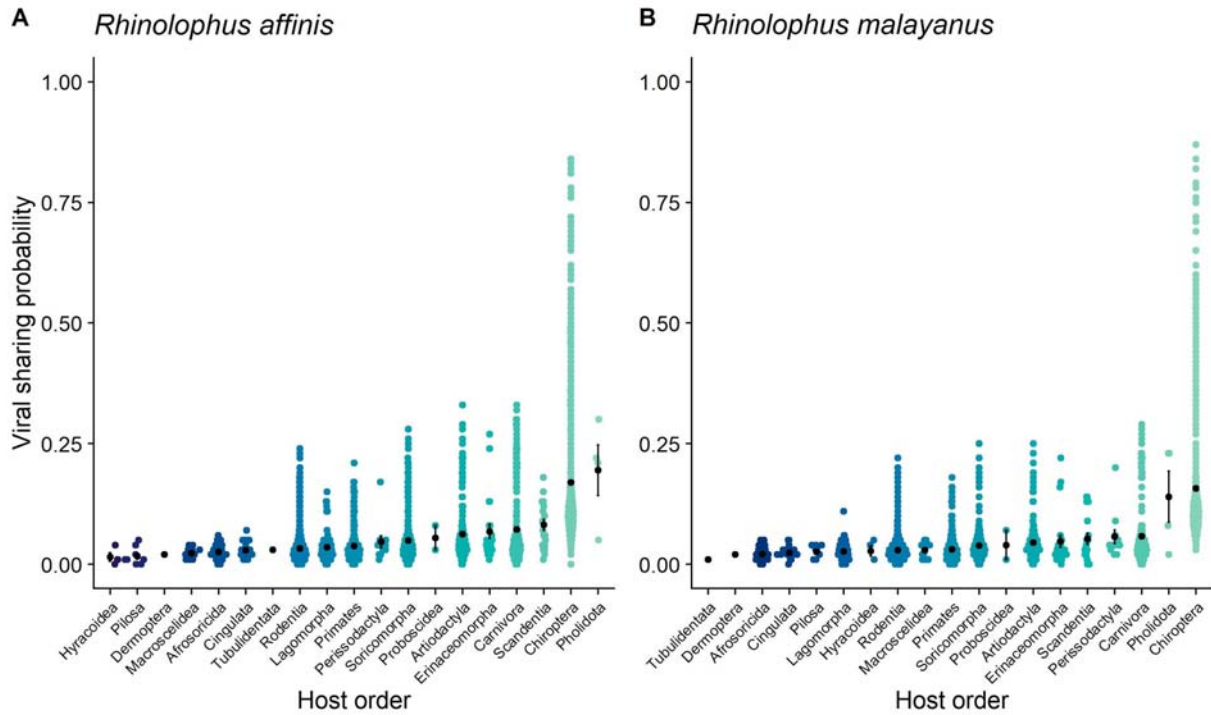

1048

1049 **Supplemental Figure 5.** Predicted species-level sharing probabilities of A) *Rhinolophus affinis* and B)  
1050 *Rhinolophus malayanus*, calculated according to the phylogeographic viral sharing model<sup>^</sup>. Each  
1051 coloured point is a mammal species. Black points and error bars denote means and standard errors for  
1052 each order. Mammal orders are arranged according to their mean sharing probability.  
1053

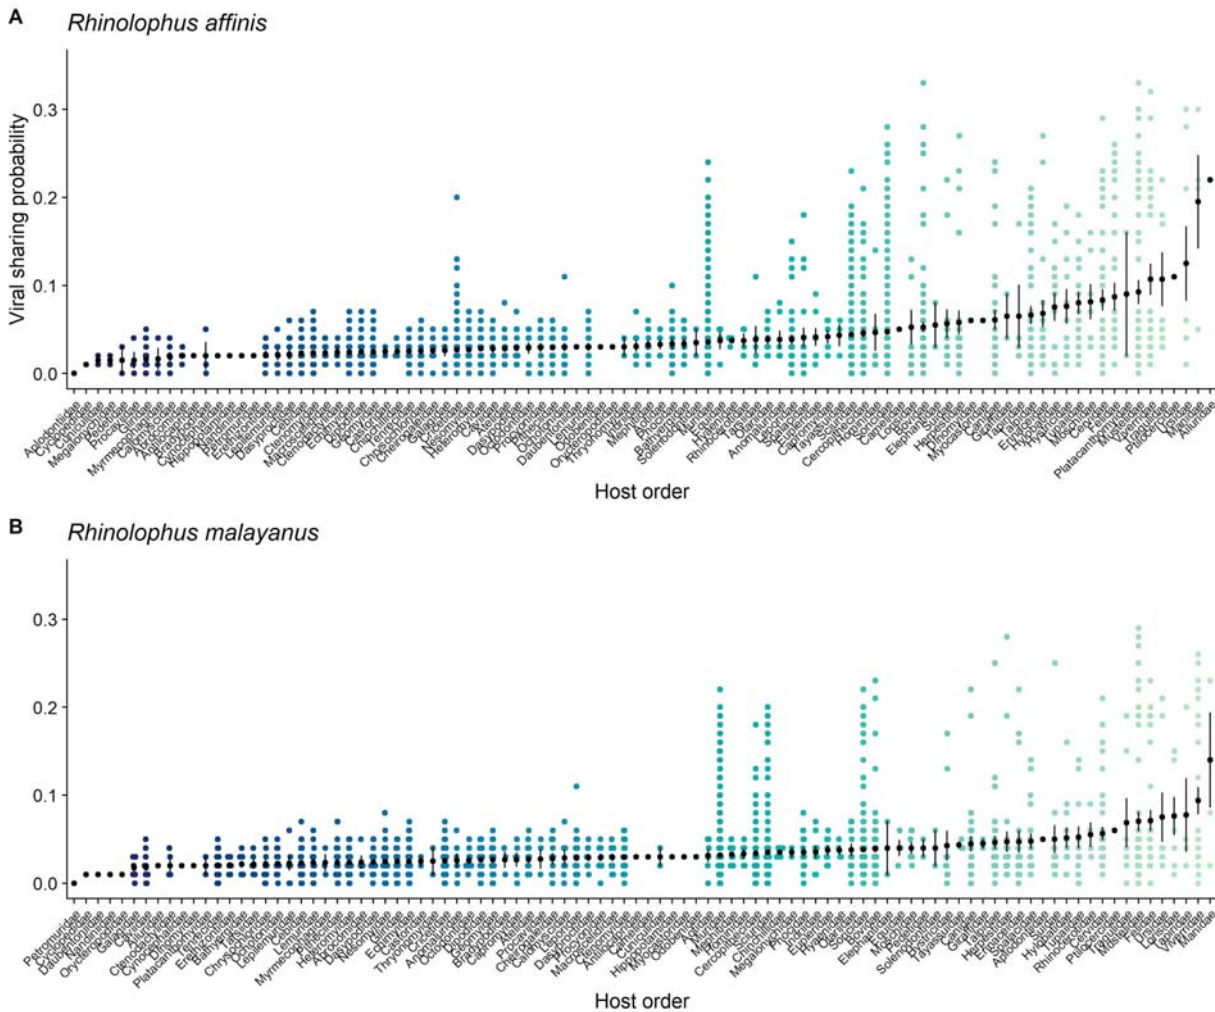

1054  
1055



1056 **Supplemental Figure 6.** To account for uncertainty in the phylogenetic distances among hosts, the  
1057 scaled-phylogeny model estimates a tree scaling parameter ( $\eta$ ) based on an early-burst model of  
1058 evolution. On the left is the unscaled bat phylogeny for the hosts in the bat-virus genera network, and on  
1059 the right is the same tree rescaled according to mean estimated scaling parameter ( $\eta = 7.92$ ).  $\eta$  values  
1060 above 1 indicate accelerating evolution, suggesting less phylogenetic conservatism in host-virus  
1061 associations among closely related taxa than would be predicted by a Brownian-motion model on the  
1062 unscaled tree.  
1063

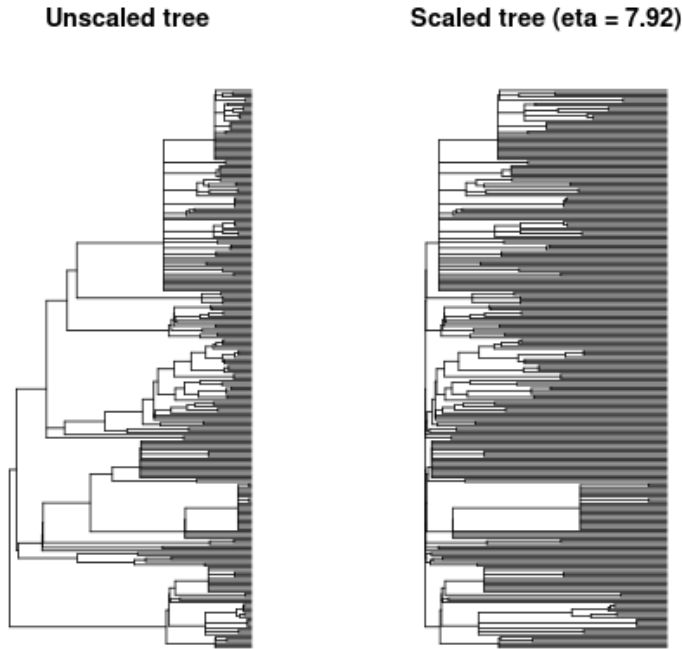

1064

1065 **Supplemental Figure 7.** Four formulations of Bayesian additive regression tree (BART) models produce  
1066 slightly different results, but largely agree. Two models use baseline BART, while two models use a  
1067 Dirichlet prior on variable importance (DART). Two are uncorrected for sampling bias (u) while two are  
1068 corrected using citation counts (c). In the final main-text model ensemble, we present a DART model  
1069 including correction for citation bias, which penalizes overfitting and spurious patterns two ways and  
1070 leads to predictions with a lower total correlation with the data, but a still-high performance (AUC =  
1071 0.90).  
1072

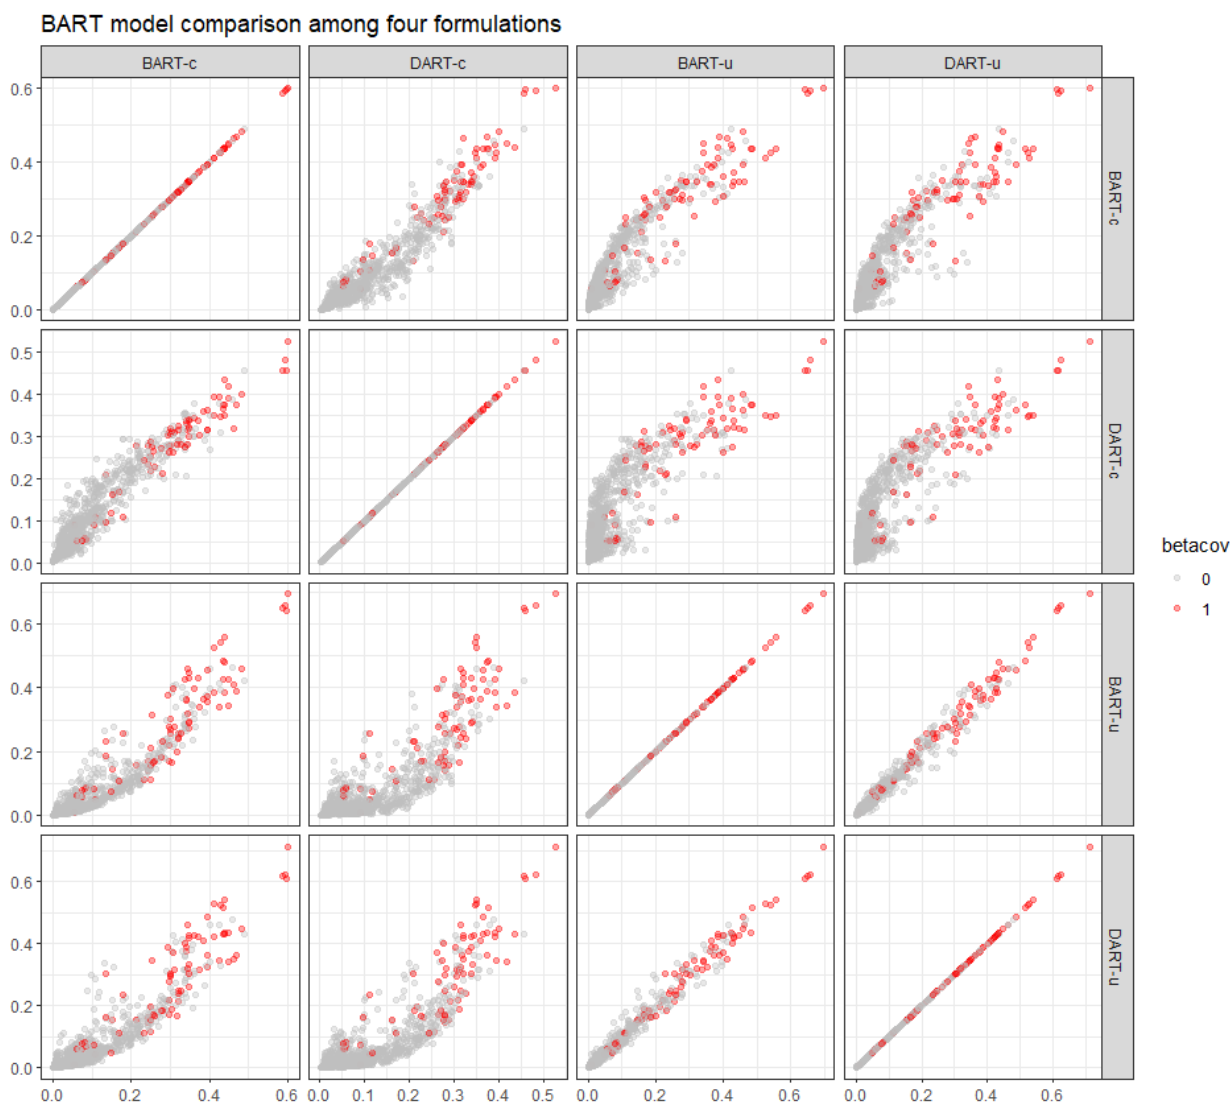

1073

1074 **Supplemental Figure 8.** Variable importance plots for the Bayesian additive regression tree models with  
 1075 uniform variable importance prior (top) versus Dirichlet prior (bottom), without (left) and with (right)  
 1076 correction for citations.

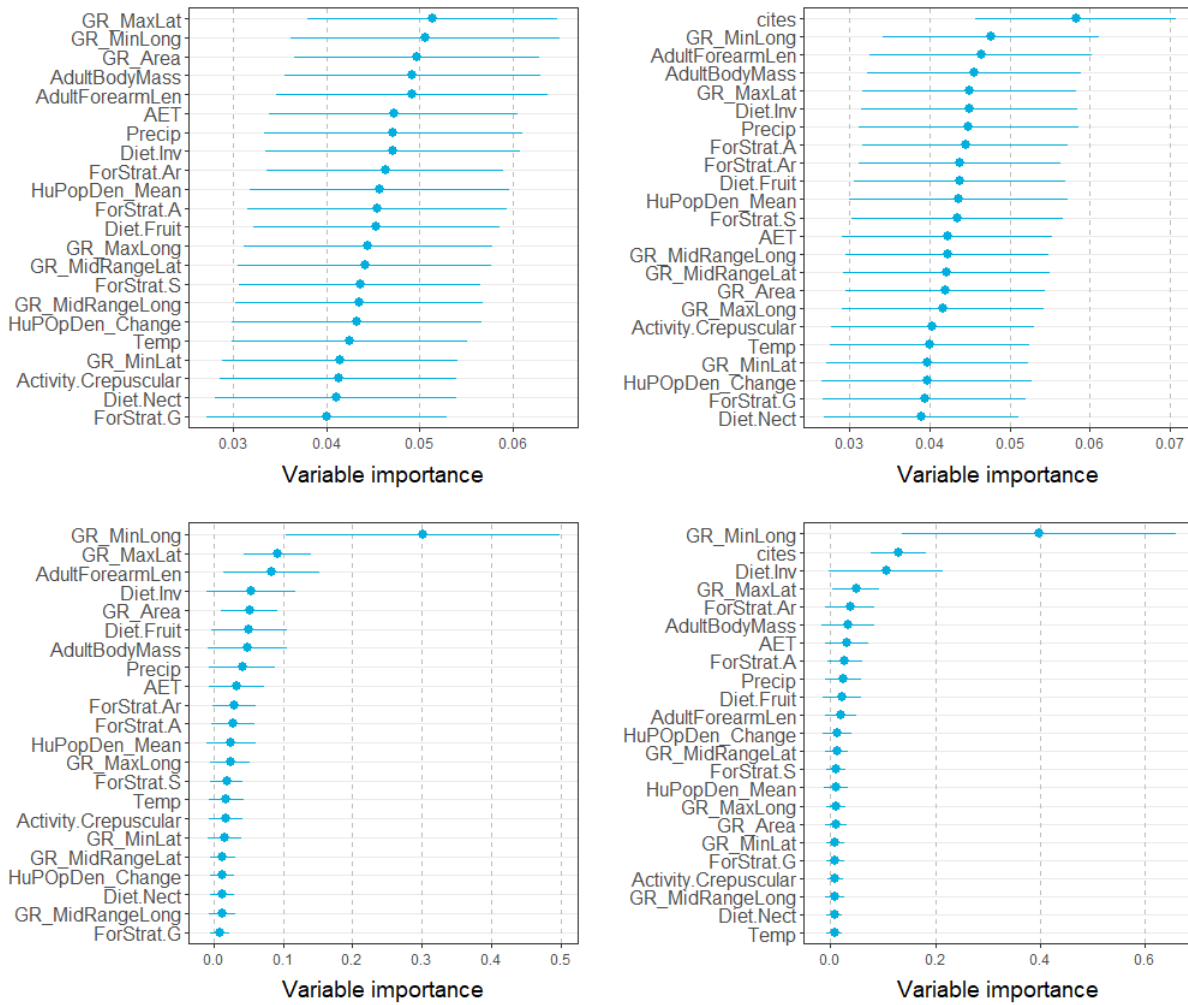

1077

1078 **Supplemental Figure 9.** Overview of the two-step kernel ridge regression (TSKRR) method. A. The  
 1079 incidence matrix  $Y$  is modelled by two kernel matrices  $K$  and  $G$ , describing the hosts (here: bats) and  
 1080 viruses, respectively. The equations for fitting the model and making predictions are given below. B.  
 1081 Computing the host kernel matrix is done based on traits, phylogeny or both. A standard radial basis  
 1082 kernel is used to transform a distance to a valid kernel. The two kernels are combined by averaging. C.  
 1083 The models are validated by specialized cross-validation. The setting interactions leaves one interaction  
 1084 out at a time and repeats this for every interaction. AUC is computed in micro-fashion. In the setting  
 1085 hosts, we leave out one host at a time and compute the AUC per virus, averaging the individual results. D.  
 1086 To assess the variable importance, we first randomly reshuffle the kernel matrices and monitor how the  
 1087 performance of a model fitted on these data drops. In a more fine-grained approach, we just reshuffle a  
 1088 single trait (indicated by the red arrow) and compare the resulting performances.  
 1089

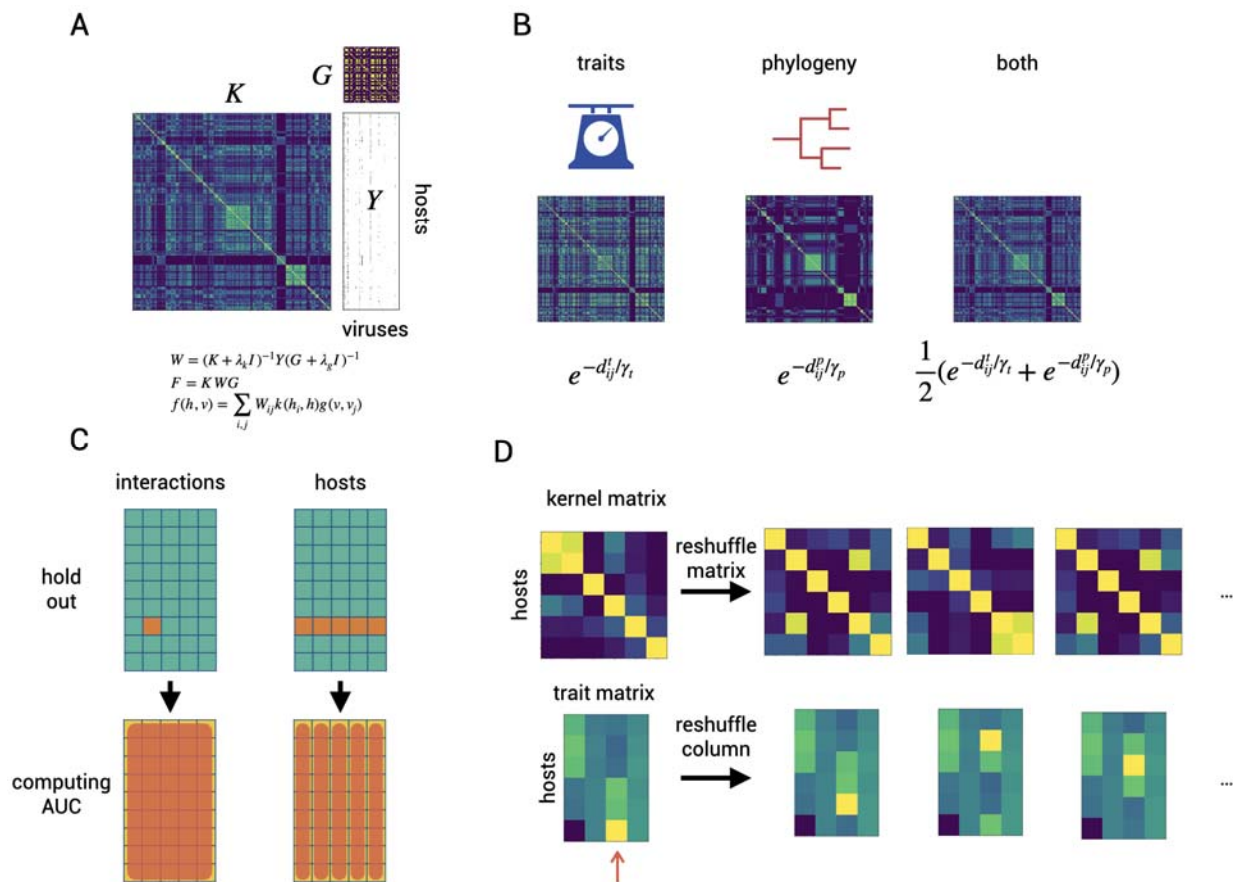

1090

1091 **Supplemental Figure 10.** Illustration of the TSKRR model and the variable importance scores. A.  
1092 Heatmap of the prediction scores, together with a hierarchical clustering based on the kernel distance of  $K$   
1093 and  $G$ . B. Variable importance computed by random permutations of the kernel matrices or a single trait.

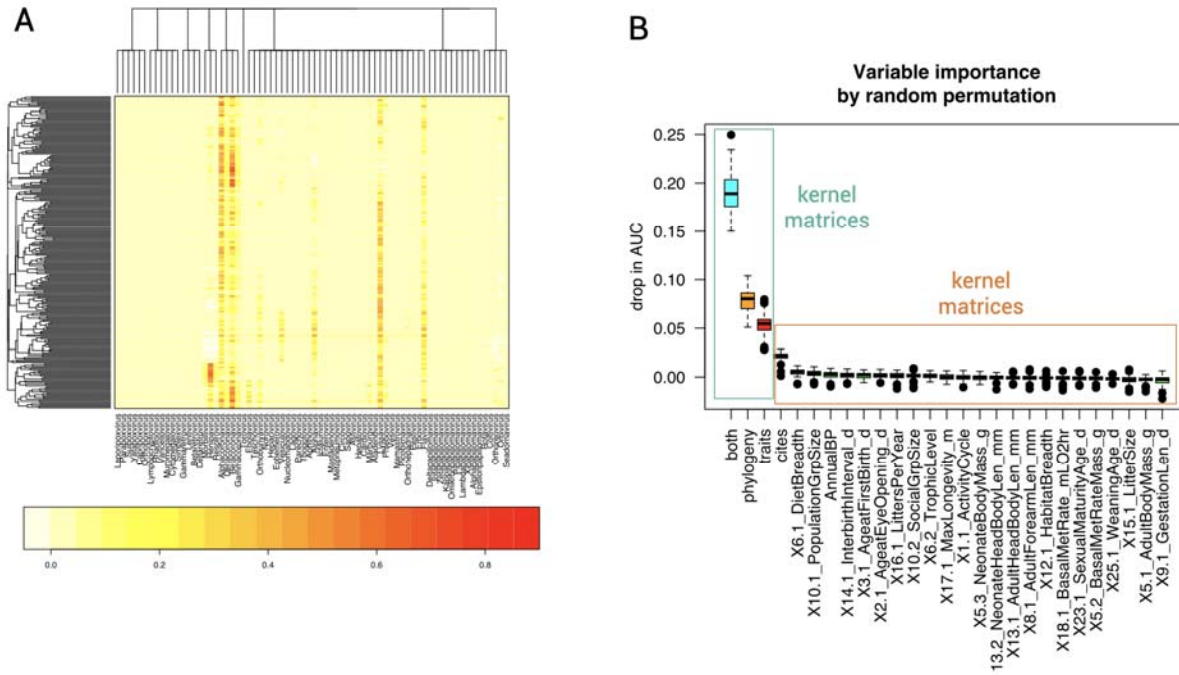

1094  
1095  
1096

1097 **Supplemental Figure 11.** Results of phylogenetic factorization applied to binomial betacoronavirus data  
1098 across bats (top) and other mammals (bottom), using raw data (left) and after weighting by citation counts  
1099 (right). Any significant clades (5% family-wise error rate) are displayed in colored shading on the  
1100 phylogeny. Bars indicate betacoronavirus detection, and clades are colored by having more (red)  
1101 (blue) positive species.  
1102

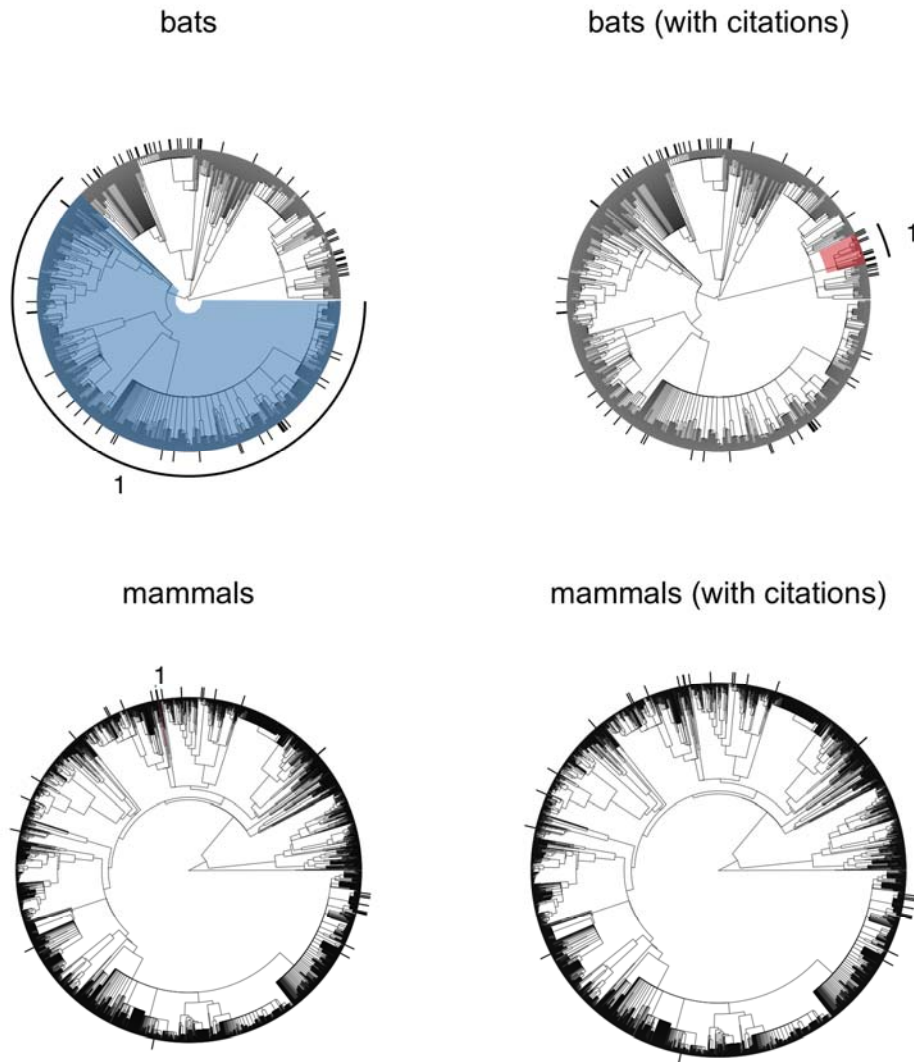

1103

1104 **Bibliography**

- 1105 1. Anthony, S. J. *et al.* Global patterns in coronavirus diversity. *Virus Evol* **3**, vex012 (2017).
- 1106 2. Denison, M. R., Graham, R. L., Donaldson, E. F., Eckerle, L. D. & Baric, R. S. Coronaviruses: an  
1107 RNA proofreading machine regulates replication fidelity and diversity. *RNA Biol.* **8**, 270–279  
1108 (2011).
- 1109 3. Ren, W. *et al.* Full-length genome sequences of two SARS-like coronaviruses in horseshoe bats and  
1110 genetic variation analysis. *J. Gen. Virol.* **87**, 3355–3359 (2006).
- 1111 4. Li, W. *et al.* Bats are natural reservoirs of SARS-like coronaviruses. *Science* **310**, 676–679 (2005).
- 1112 5. Yang, X.-L. *et al.* Isolation and Characterization of a Novel Bat Coronavirus Closely Related to the  
1113 Direct Progenitor of Severe Acute Respiratory Syndrome Coronavirus. *J. Virol.* **90**, 3253–3256  
1114 (2015).
- 1115 6. Zhou, P. *et al.* A pneumonia outbreak associated with a new coronavirus of probable bat origin.  
1116 *Nature* **579**, 270–273 (2020).
- 1117 7. Guan, Y. *et al.* Isolation and characterization of viruses related to the SARS coronavirus from  
1118 animals in southern China. *Science* **302**, 276–278 (2003).
- 1119 8. Hu, B. *et al.* Discovery of a rich gene pool of bat SARS-related coronaviruses provides new insights  
1120 into the origin of SARS coronavirus. *PLoS Pathog.* **13**, e1006698 (2017).
- 1121 9. Memish, Z. A. *et al.* Middle East respiratory syndrome coronavirus in bats, Saudi Arabia. *Emerg.*  
1122 *Infect. Dis.* **19**, 1819–1823 (2013).
- 1123 10. Wang, Q. *et al.* Bat origins of MERS-CoV supported by bat coronavirus HKU4 usage of human  
1124 receptor CD26. *Cell Host Microbe* **16**, 328–337 (2014).
- 1125 11. Yang, Y. *et al.* Receptor usage and cell entry of bat coronavirus HKU4 provide insight into bat-to-  
1126 human transmission of MERS coronavirus. *Proc. Natl. Acad. Sci. U. S. A.* **111**, 12516–12521 (2014).
- 1127 12. Hu, B., Ge, X., Wang, L.-F. & Shi, Z. Bat origin of human coronaviruses. *Virology Journal* vol. 12  
1128 (2015).
- 1129 13. Anthony, S. J. *et al.* Further Evidence for Bats as the Evolutionary Source of Middle East  
1130 Respiratory Syndrome Coronavirus. *MBio* **8**, (2017).
- 1131 14. Anthony, S. J. *et al.* Coronaviruses in bats from Mexico. *J. Gen. Virol.* **94**, 1028–1038 (2013).
- 1132 15. Yang, L. *et al.* MERS-related betacoronavirus in *Vespertilio superans* bats, China. *Emerg. Infect.*  
1133 *Dis.* **20**, 1260–1262 (2014).
- 1134 16. Zhou, H. *et al.* A novel bat coronavirus reveals natural insertions at the S1/S2 cleavage site of the  
1135 Spike protein and a possible recombinant origin of HCoV-19. doi:10.1101/2020.03.02.974139.
- 1136 17. Nielsen, R., Wang, H. & Pipes, L. Synonymous mutations and the molecular evolution of SARS-  
1137 Cov-2 origins. doi:10.1101/2020.04.20.052019.
- 1138 18. Lam, T. T.-Y. *et al.* Identifying SARS-CoV-2 related coronaviruses in Malayan pangolins. *Nature*  
1139 (2020) doi:10.1038/s41586-020-2169-0.
- 1140 19. Xiao, K. *et al.* Isolation of SARS-CoV-2-related coronavirus from Malayan pangolins. *Nature*  
1141 (2020) doi:10.1038/s41586-020-2313-x.
- 1142 20. Zhang, T., Wu, Q. & Zhang, Z. Probable Pangolin Origin of SARS-CoV-2 Associated with the  
1143 COVID-19 Outbreak. *Curr. Biol.* **30**, 1578 (2020).
- 1144 21. Andersen, K. G., Rambaut, A., Ian Lipkin, W., Holmes, E. C. & Garry, R. F. The proximal origin of  
1145 SARS-CoV-2. *Nature Medicine* vol. 26 450–452 (2020).
- 1146 22. Viana, M. *et al.* Assembling evidence for identifying reservoirs of infection. *Trends Ecol. Evol.* **29**,  
1147 270–279 (2014).

- 1148 23. Plowright, R. K. *et al.* Prioritizing surveillance of Nipah virus in India. *PLoS Negl. Trop. Dis.* **13**,  
1149 e0007393 (2019).
- 1150 24. Becker, D. J., Crowley, D. E., Washburne, A. D. & Plowright, R. K. Temporal and spatial  
1151 limitations in global surveillance for bat filoviruses and henipaviruses. *Biol. Lett.* **15**, 20190423  
1152 (2019).
- 1153 25. Becker, D. J., Washburne, A. D., Faust, C. L., Mordecai, E. A. & Plowright, R. K. The problem of  
1154 scale in the prediction and management of pathogen spillover. *Philos. Trans. R. Soc. Lond. B Biol.*  
1155 *Sci.* **374**, 20190224 (2019).
- 1156 26. Becker, D. J. & Han, B. A. The macroecology and evolution of avian competence for *Borrelia*  
1157 *burgdorferi*. doi:10.1101/2020.04.15.040352.
- 1158 27. Han, B. A. *et al.* Undiscovered Bat Hosts of Filoviruses. *PLoS Negl. Trop. Dis.* **10**, e0004815  
1159 (2016).
- 1160 28. Han, B. A. *et al.* Confronting data sparsity to identify potential sources of Zika virus spillover  
1161 infection among primates. *Epidemics* **27**, 59–65 (2019).
- 1162 29. Washburne, A. D. *et al.* Taxonomic patterns in the zoonotic potential of mammalian viruses. *PeerJ*  
1163 **6**, e5979 (2018).
- 1164 30. Olival, K. J. *et al.* Host and viral traits predict zoonotic spillover from mammals. *Nature* **546**, 646–  
1165 650 (2017).
- 1166 31. Fritz, S. A., Bininda-Emonds, O. R. P. & Purvis, A. Geographical variation in predictors of  
1167 mammalian extinction risk: big is bad, but only in the tropics. *Ecol. Lett.* **12**, 538–549 (2009).
- 1168 32. Jones, K. E. *et al.* PanTHERIA: a species-level database of life history, ecology, and geography of  
1169 extant and recently extinct mammals. *Ecology* vol. 90 2648–2648 (2009).
- 1170 33. Wilman, H. *et al.* EltonTraits 1.0: Species-level foraging attributes of the world’s birds and  
1171 mammals. *Ecology* vol. 95 2027–2027 (2014).
- 1172 34. Trifonova, N. *et al.* Spatio-temporal Bayesian network models with latent variables for revealing  
1173 trophic dynamics and functional networks in fisheries ecology. *Ecological Informatics* vol. 30 142–  
1174 158 (2015).
- 1175 35. Rohr, R. P., Scherer, H., Kehrl, P., Mazza, C. & Bersier, L.-F. Modeling food webs: exploring  
1176 unexplained structure using latent traits. *Am. Nat.* **176**, 170–177 (2010).
- 1177 36. Dallas, T., Park, A. W. & Drake, J. M. Predicting cryptic links in host-parasite networks. *PLoS*  
1178 *Comput. Biol.* **13**, e1005557 (2017).
- 1179 37. Han, B. A., Schmidt, J. P., Bowden, S. E. & Drake, J. M. Rodent reservoirs of future zoonotic  
1180 diseases. *Proceedings of the National Academy of Sciences* vol. 112 7039–7044 (2015).
- 1181 38. Brandão, P. E. *et al.* A coronavirus detected in the vampire bat *Desmodus rotundus*. *Braz. J. Infect.*  
1182 *Dis.* **12**, 466–468 (2008).
- 1183 39. Corman, V. M. *et al.* Highly diversified coronaviruses in neotropical bats. *J. Gen. Virol.* **94**, 1984–  
1184 1994 (2013).
- 1185 40. Moreira-Soto, A. *et al.* Neotropical bats from Costa Rica harbour diverse coronaviruses. *Zoonoses*  
1186 *Public Health* **62**, 501–505 (2015).
- 1187 41. Wang, L. *et al.* Discovery and genetic analysis of novel coronaviruses in least horseshoe bats in  
1188 southwestern China. *Emerg. Microbes Infect.* **6**, e14 (2017).
- 1189 42. Lin, X.-D. *et al.* Extensive diversity of coronaviruses in bats from China. *Virology* vol. 507 1–10  
1190 (2017).
- 1191 43. Wacharapluesadee, S. *et al.* Diversity of coronavirus in bats from Eastern Thailand. *Virol. J.* **12**, 57



- 1192 (2015).
- 1193 44. Guy, C., Ratcliffe, J. M. & Mideo, N. The influence of bat ecology on viral diversity and reservoir  
1194 status. *Ecol. Evol.* **2008**, 209 (2020).
- 1195 45. Washburne, A. D. *et al.* Phylofactorization: a graph partitioning algorithm to identify phylogenetic  
1196 scales of ecological data. *Ecol. Monogr.* **89**, e01353 (2019).
- 1197 46. Crowley, D., Becker, D., Washburne, A. & Plowright, R. Identifying Suspect Bat Reservoirs of  
1198 Emerging Infections. *Vaccines* vol. 8 228 (2020).
- 1199 47. Damas, J., Hughes, G. M., Keough, K. C. & Painter, C. A. Broad Host Range of SARS-CoV-2  
1200 Predicted by Comparative and Structural Analysis of ACE2 in Vertebrates. *bioRxiv* (2020).
- 1201 48. Albery, G. F., Eskew, E. A., Ross, N. & Olival, K. J. Predicting the global mammalian viral sharing  
1202 network using phylogeography. *Nat. Commun.* **11**, 2260 (2020).
- 1203 49. Wang, M. *et al.* SARS-CoV Infection in a Restaurant from Palm Civet. *Emerging Infectious  
1204 Diseases* vol. 11 1860–1865 (2005).
- 1205 50. Song, H.-D. *et al.* Cross-host evolution of severe acute respiratory syndrome coronavirus in palm  
1206 civet and human. *Proc. Natl. Acad. Sci. U. S. A.* **102**, 2430–2435 (2005).
- 1207 51. Dougherty, E. R., Seidel, D. P., Carlson, C. J., Spiegel, O. & Getz, W. M. Going through the  
1208 motions: incorporating movement analyses into disease research. *Ecol. Lett.* **21**, 588–604 (2018).
- 1209 52. Lehmann, D. *et al.* Pangolins and bats living together in underground burrows in Lopé National  
1210 Park, Gabon. *African Journal of Ecology* (2020) doi:10.1111/aje.12759.
- 1211 53. Oreshkova, N. *et al.* SARS-CoV2 infection in farmed mink, Netherlands, April 2020.  
1212 doi:10.1101/2020.05.18.101493.
- 1213 54. Kim, Y.-I. *et al.* Infection and Rapid Transmission of SARS-CoV-2 in Ferrets. *Cell Host Microbe  
1214* **27**, 704–709.e2 (2020).
- 1215 55. Shi, J. *et al.* Susceptibility of ferrets, cats, dogs, and other domesticated animals to SARS–  
1216 coronavirus 2. *Science* (2020) doi:10.1126/science.abb7015.
- 1217 56. Yang, X.-L. *et al.* Genetically Diverse Filoviruses in Rousettus and Eonycteris spp. Bats, China,  
1218 2009 and 2015. *Emerg. Infect. Dis.* **23**, 482–486 (2017).
- 1219 57. Seifert, S. N. *et al.* Rousettus aegyptiacus Bats Do Not Support Productive Nipah Virus Replication.  
1220 *The Journal of Infectious Diseases* vol. 221 S407–S413 (2020).
- 1221 58. Wacharapluesadee, S. *et al.* Longitudinal study of age-specific pattern of coronavirus infection in  
1222 Lyle’s flying fox (*Pteropus lylei*) in Thailand. *Virol. J.* **15**, 38 (2018).
- 1223 59. Latinne, A. *et al.* Origin and cross-species transmission of bat coronaviruses in China.  
1224 doi:10.1101/2020.05.31.116061.
- 1225 60. Yang, L. *et al.* Novel SARS-like betacoronaviruses in bats, China, 2011. *Emerg. Infect. Dis.* **19**,  
1226 989–991 (2013).
- 1227 61. Geldenhuys, M. *et al.* A metagenomic viral discovery approach identifies potential zoonotic and  
1228 novel mammalian viruses in Neoromicia bats within South Africa. *PLoS One* **13**, e0194527 (2018).
- 1229 62. Memish, Z. A. *et al.* Middle East respiratory syndrome coronavirus in bats, Saudi Arabia. *Emerg.  
1230 Infect. Dis.* **19**, 1819–1823 (2013).
- 1231 63. Luo, Y. *et al.* Longitudinal Surveillance of Betacoronaviruses in Fruit Bats in Yunnan Province,  
1232 China During 2009–2016. *Virol. Sin.* **33**, 87–95 (2018).
- 1233 64. Peel, A. J. *et al.* Synchronous shedding of multiple bat paramyxoviruses coincides with peak periods  
1234 of Hendra virus spillover. *Emerg. Microbes Infect.* **8**, 1314–1323 (2019).
- 1235 65. de Souza Cortez J. L. Dunnum A. W. Ferguson F. A. Anwarali Khan D. L. Paul D. M. Reeder N. B.

- 1236 Simmons B. M. Thiers C. W. Thompson N S. Upham M. P. M. Vanhove P. W. Webala M. Weksler  
1237 R. Yanagihara P. S. Soltis., C. J. A. S. A. B. A. J. B. C. A. C. B. M. B. Integrating biodiversity  
1238 infrastructure into pathogen discovery and mitigation of epidemic infectious diseases. *Bioscience*  
1239 (2020) doi:biaa064.
- 1240 66. Kingston, T. *et al.* Networking networks for global bat conservation. in *Bats in the Anthropocene:*  
1241 *Conservation of Bats in a Changing World* 539–569 (Springer, Cham, 2016).
- 1242 67. Phelps, K. L. *et al.* Bat Research Networks and Viral Surveillance: Gaps and Opportunities in  
1243 Western Asia. *Viruses* **11**, (2019).
- 1244 68. Teeling, E. C. *et al.* Bat Biology, Genomes, and the Bat1K Project: To Generate Chromosome-Level  
1245 Genomes for All Living Bat Species. *Annu Rev Anim Biosci* **6**, 23–46 (2018).
- 1246 69. Mandl, J. N., Schneider, C., Schneider, D. S. & Baker, M. L. Going to Bat(s) for Studies of Disease  
1247 Tolerance. *Front. Immunol.* **9**, 2112 (2018).
- 1248 70. Skirmuntt, E. C., Escalera-Zamudio, M., Teeling, E. C., Smith, A. & Katzourakis, A. The Potential  
1249 Role of Endogenous Viral Elements in the Evolution of Bats as Reservoirs for Zoonotic Viruses.  
1250 *Annu Rev Virol* (2020) doi:10.1146/annurev-virology-092818-015613.
- 1251 71. Jebb, D. *et al.* Six new reference-quality bat genomes illuminate the molecular basis and evolution of  
1252 bat adaptations. (2019).
- 1253 72. Gervasi, S. S., Civitello, D. J., Kilvitis, H. J. & Martin, L. B. The context of host competence: a role  
1254 for plasticity in host–parasite dynamics. *Trends Parasitol.* **31**, 419–425 (2015).
- 1255 73. Martin, L. B., Burgan, S. C., Adelman, J. S. & Gervasi, S. S. Host Competence: An Organismal Trait  
1256 to Integrate Immunology and Epidemiology. *Integr. Comp. Biol.* **56**, 1225–1237 (2016).
- 1257 74. Callaway, E. & Cyranoski, D. Why snakes probably aren't spreading the new China virus. *Nature*  
1258 (2020) doi:10.1038/d41586-020-00180-8.
- 1259 75. Gong, Y., Wen, G., Jiang, J. & Feng, X. Complete title: Codon bias analysis may be insufficient for  
1260 identifying host(s) of a novel virus. *J. Med. Virol.* (2020) doi:10.1002/jmv.25977.
- 1261 76. Zhao, H. COVID-19 drives new threat to bats in China. *Science* **367**, 1436 (2020).
- 1262 77. Fenton, M. B. *et al.* Knowledge gaps about rabies transmission from vampire bats to humans. *Nature*  
1263 *Ecology & Evolution* **4**, 517–518 (2020).
- 1264 78. López-Baucells, A., Rocha, R. & Fernández-Llamazares, Á. When bats go viral: negative framings  
1265 in virological research imperil bat conservation. *Mamm. Rev.* **48**, 62–66 (2018).
- 1266 79. O'Shea, T. J., Cryan, P. M., Hayman, D. T. S., Plowright, R. K. & Streicker, D. G. Multiple  
1267 mortality events in bats: a global review. *Mamm. Rev.* **46**, 175–190 (2016).
- 1268 80. MB Fenton, S Mubareka, SM Tsang, NB Simmons, DJ Becker. COVID-19 and threats to bats.  
1269 *FACETS* in press (2020).
- 1270 81. Aguiar, L. M. S., Brito, D. & Machado, R. B. Do current vampire bat (*Desmodus rotundus*)  
1271 population control practices pose a threat to Dekeyser's nectar bat's (*Lonchophylla dekeyseri*) long-  
1272 term persistence in the Cerrado? *Acta Chiropt.* **12**, 275–282 (2010).
- 1273 82. Streicker, D. G. *et al.* Ecological and anthropogenic drivers of rabies exposure in vampire bats:  
1274 implications for transmission and control. *Proc. Biol. Sci.* **279**, 3384–3392 (2012).
- 1275 83. Blackwood, J. C., Streicker, D. G., Altizer, S. & Rohani, P. Resolving the roles of immunity,  
1276 pathogenesis, and immigration for rabies persistence in vampire bats. *Proc. Natl. Acad. Sci. U. S. A.*  
1277 **110**, 20837–20842 (2013).
- 1278 84. Frick, W. F. *et al.* An emerging disease causes regional population collapse of a common North  
1279 American bat species. *Science* **329**, 679–682 (2010).

- 1280 85. Sabir, J. S. M. *et al.* Co-circulation of three camel coronavirus species and recombination of MERS-  
1281 CoVs in Saudi Arabia. *Science* **351**, 81–84 (2016).
- 1282 86. Guth, S., Visher, E., Boots, M. & Brook, C. E. Host phylogenetic distance drives trends in virus  
1283 virulence and transmissibility across the animal–human interface. *Philos. Trans. R. Soc. Lond. B*  
1284 *Biol. Sci.* **374**, 20190296 (2019).
- 1285 87. Redondo, R. A. F., Brina, L. P. S., Silva, R. F., Ditchfield, A. D. & Santos, F. R. Molecular  
1286 systematics of the genus *Artibeus* (Chiroptera: Phyllostomidae). *Mol. Phylogenet. Evol.* **49**, 44–58  
1287 (2008).
- 1288 88. Bouchard, S. *Chaerephon pumilus*. *Mammalian Species* 1–6 (1998).
- 1289 89. Hooper, S. R., Van Den Bussche, R. A. & Horáček, I. Generic Status of the American Pipistrelles  
1290 (Vespertilionidae) with Description of a New Genus. *J. Mammal.* **87**, 981–992 (2006).
- 1291 90. Desjardins-Proulx, P., Laigle, I., Poisot, T. & Gravel, D. Ecological interactions and the Netflix  
1292 problem. *PeerJ* **5**, e3644 (2017).
- 1293 91. Stock, M., Poisot, T., Waegeman, W. & De Baets, B. Linear filtering reveals false negatives in  
1294 species interaction data. *Sci. Rep.* **7**, 45908 (2017).
- 1295 92. Drake, J. M. & Richards, R. L. Estimating environmental suitability. *Ecosphere* vol. 9 e02373  
1296 (2018).
- 1297 93. Dallas, T. A., Carlson, C. J. & Poisot, T. Testing predictability of disease outbreaks with a simple  
1298 model of pathogen biogeography. *R Soc Open Sci* **6**, 190883 (2019).
- 1299 94. Elmasri, M., Farrell, M. J., Jonathan Davies, T. & Stephens, D. A. A hierarchical Bayesian model for  
1300 predicting ecological interactions using scaled evolutionary relationships. *The Annals of Applied*  
1301 *Statistics* vol. 14 221–240 (2020).
- 1302 95. Cadotte, M. W. *et al.* Phylogenetic diversity metrics for ecological communities: integrating species  
1303 richness, abundance and evolutionary history. *Ecol. Lett.* **13**, 96–105 (2010).
- 1304 96. Park, A. W. *et al.* Characterizing the phylogenetic specialism–generalism spectrum of mammal  
1305 parasites. *Proceedings of the Royal Society B: Biological Sciences* vol. 285 20172613 (2018).
- 1306 97. Harvey, P. H. & Pagel, M. D. *The comparative method in evolutionary biology*. (Oxford University  
1307 Press, USA, 1998).
- 1308 98. Harmon, L. J. *et al.* Early bursts of body size and shape evolution are rare in comparative data.  
1309 *Evolution* **64**, 2385–2396 (2010).
- 1310 99. Mollentze, N. & Streicker, D. G. Viral zoonotic risk is homogenous among taxonomic orders of  
1311 mammalian and avian reservoir hosts. *Proc. Natl. Acad. Sci. U. S. A.* **117**, 9423–9430 (2020).
- 1312 100. Schmidt, J. P. *et al.* Ecological indicators of mammal exposure to Ebolavirus. *Philos. Trans. R. Soc.*  
1313 *Lond. B Biol. Sci.* **374**, 20180337 (2019).
- 1314 101. Pandit, P. S. *et al.* Predicting wildlife reservoirs and global vulnerability to zoonotic Flaviviruses.  
1315 *Nat. Commun.* **9**, 5425 (2018).
- 1316 102. Evans, M. V., Dallas, T. A., Han, B. A., Murdock, C. C. & Drake, J. M. Data-driven identification of  
1317 potential Zika virus vectors. *Elife* **6**, (2017).
- 1318 103. Yang, L. H. & Han, B. A. Data-driven predictions and novel hypotheses about zoonotic tick vectors  
1319 from the genus *Ixodes*. *BMC Ecol.* **18**, 7 (2018).
- 1320 104. Elith, J., Leathwick, J. R. & Hastie, T. A working guide to boosted regression trees. *J. Anim. Ecol.*  
1321 **77**, 802–813 (2008).
- 1322 105. Carlson, C. J. *embarcadero*: Species distribution modelling with Bayesian additive regression trees in  
1323 R. doi:10.1101/774604.

- 1324 106. Chipman, H. A., George, E. I. & McCulloch, R. E. BART: Bayesian additive regression trees. *The*  
1325 *Annals of Applied Statistics* vol. 4 266–298 (2010).
- 1326 107. Chen, W. *et al.* The illegal exploitation of hog badgers (*Arctonyx collaris*) in China: genetic  
1327 evidence exposes regional population impacts. *Conservation Genetics Resources* vol. 7 697–704  
1328 (2015).
- 1329 108. Stock, M., Pahikkala, T., Airola, A., De Baets, B. & Waegeman, W. A Comparative Study of  
1330 Pairwise Learning Methods Based on Kernel Ridge Regression. *Neural Comput.* **30**, 2245–2283  
1331 (2018).
- 1332 109. Stock, M., Pahikkala, T., Airola, A., Waegeman, W. & De Baets, B. Algebraic shortcuts for leave-  
1333 one-out cross-validation in supervised network inference. *Brief. Bioinform.* (2018)  
1334 doi:10.1093/bib/bby095.
- 1335 110. Stekhoven, D. J. & Bühlmann, P. MissForest—non-parametric missing value imputation for mixed-  
1336 type data. *Bioinformatics* **28**, 112–118 (2012).
- 1337 111. Schölkopf, B., Smola, A. J., Managing Director of the Max Planck Institute for Biological  
1338 Cybernetics in Tübingen Germany Profe Bernhard Scholkopf & Bach, F. *Learning with Kernels:*  
1339 *Support Vector Machines, Regularization, Optimization, and Beyond.* (MIT Press, 2002).
- 1340 112. Foley, N. M., Goodman, S. M., Whelan, C. V., Puechmaille, S. J. & Teeling, E. Towards navigating  
1341 the Minotaur’s labyrinth: cryptic diversity and taxonomic revision within the speciose genus  
1342 *Hipposideros* (Hipposideridae). *Acta Chiropt.* **19**, 1–18 (2017).
